# Supplementary material for: A conserved KLF-autophagy pathway modulates nematode lifespan and mammalian age-associated vascular dysfunction
Source: PubMed Central journal article supplement (PMC5640649; doi:10.1038/s41467-017-00899-5), 2017-10-13
Supplement: 41467_2017_899_MOESM1_ESM.pdf [file 41467_2017_899_MOESM1_ESM.pdf]

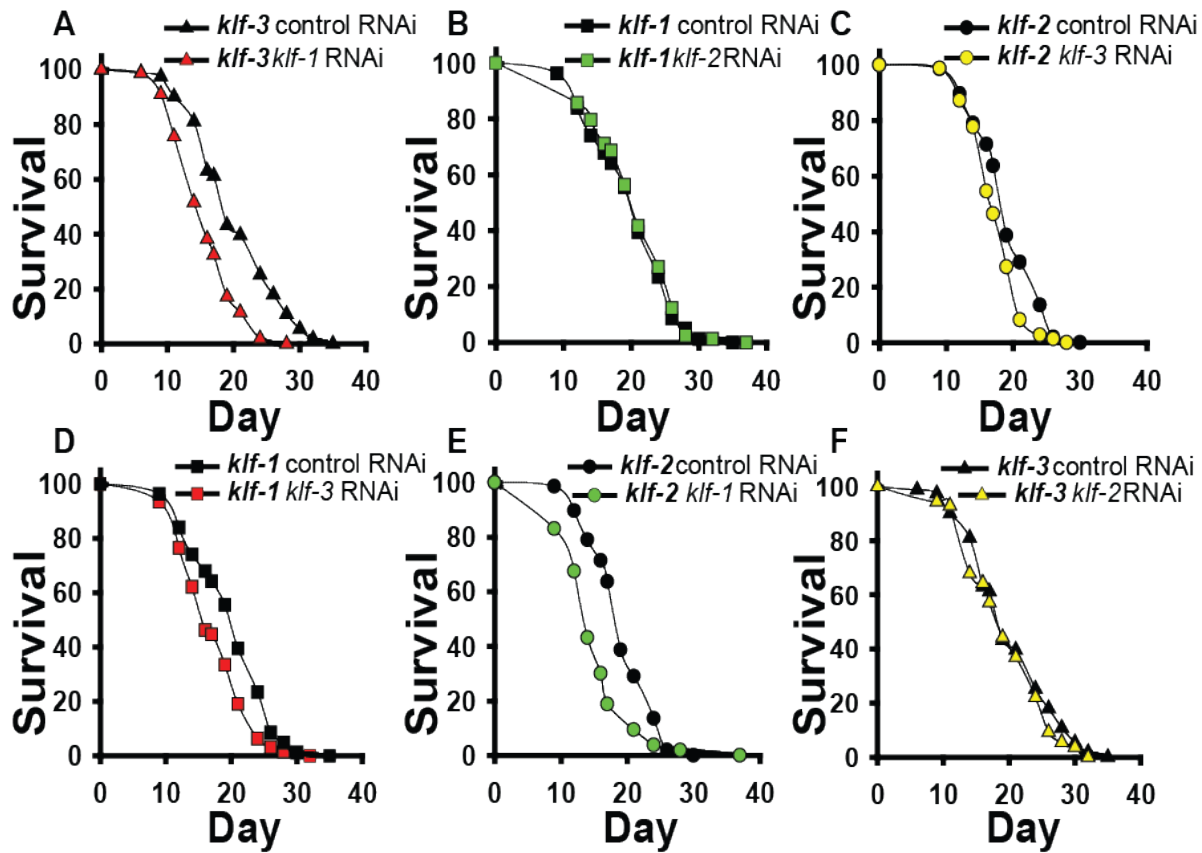

**Supplementary Figure 1. Dual loss of function of the Kruppel-like factors reduces *C. elegans* lifespan.** (A-F) Lifespan analysis of single KLF mutant worms fed RNAi bacteria targeting a second KLF gene or RNAi bacteria containing empty vector. Bolded genes represent the mutant strain. *Klf-3* mutants are represented with a triangle, *klf-2* with a circle, and *klf-1* with a square. P-value < 0.05 by Mantel-Cox log-rank tests compared to control RNAi bacteria. See also Supplementary Tables 1 and 2 for details of lifespan analyses and replicate experiments

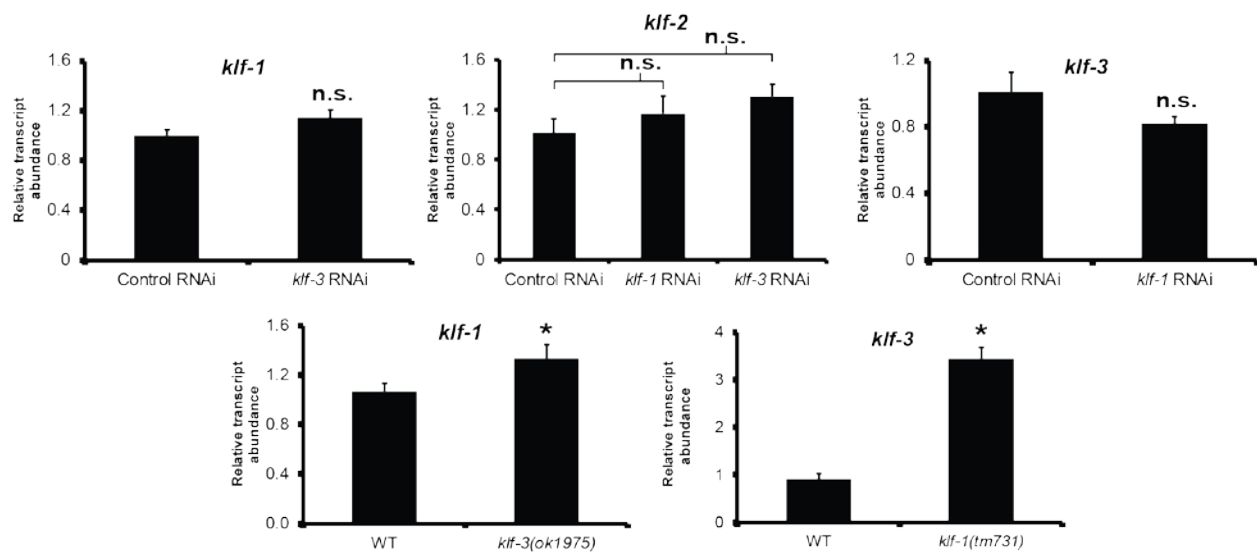

**Supplementary Figure 2. Single RNAi depletion of either *klf-1* or *klf-3* is specific and does not alter expression of another *klf*, while mutant worms demonstrate compensatory induction of *klfs*. *klf-1* and *klf-2* transcript levels are nonsignificantly changed by RNAi bacteria feeding targeting *klf-3*, and *klf-2* and *klf-3* transcript levels are nonsignificantly changed by RNAi bacteria feeding targeting *klf-1*. *Klf-1* transcript levels are higher in *klf-3(ok1075)* mutants while *klf-3* is strongly induced in *klf-1(tm731)* mutants. N=3 biological replicates. \* represents P-value<0.05, n.s. represents not significant (P-value <0.1) by Students T-test. Error bars represent standard error of the mean.**

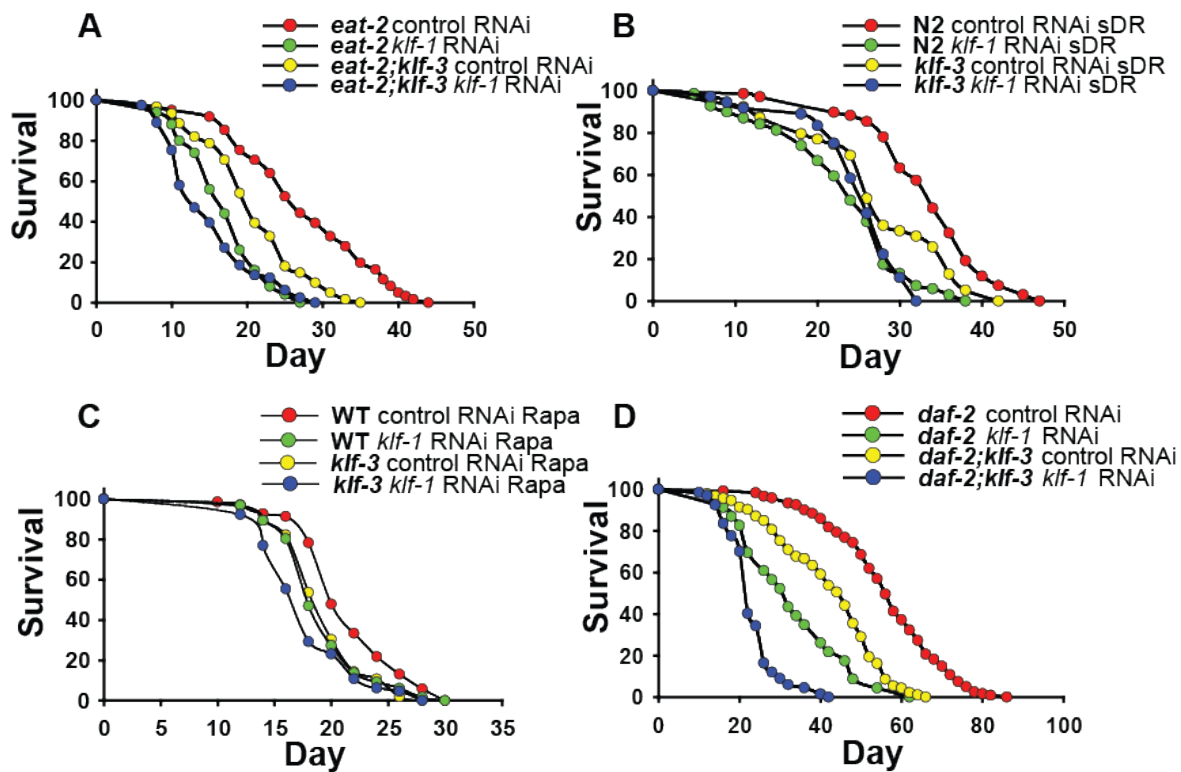

**Supplementary Figure 3. Double loss of function of *klf-1* and *klf-3* suppresses enhanced longevity in multiple longevity paradigms.** Representative traces are shown here, with full lifespan data and replicates in Supplementary Table 3. Lifespan extension of *eat-2(ad1116)* animals (A), animals subjected to solid agar dietary restriction at  $10^8$  cfu/mL (sDR) (B), 100uM rapamycin (C), and *daf-2(e1370)* animals (D) is strongly suppressed after double loss of function of *klf-1* and *klf-3*. *klf-3(ok1975)* mutants have mildly suppressed lifespan in *eat-2(ad1116)*, sDR, *daf-2(e1370)* and rapamycin treated animals. RNAi against *klf-1* in rapamycin treated animals had the same lifespan as *klf-3* mutants, but more strongly suppressed lifespan in *eat-2(ad1116)*, sDR, and *daf-2(e1370)* animals. In *eat-2(ad1116)* and sDR animals, RNAi against *klf-1* had similar effects as RNAi against *klf-1* in a *klf-3* mutant background, while in rapamycin treated and *daf-2(e1370)* animals, double loss of function of *klf-1* and *klf-3*

had the strongest suppressive effect on lifespan. See also Supplementary Table 3 for full details on numbers and replicates. Strain is represented in bold. P-value<0.05 by Mantel-Cox log-rank tests.

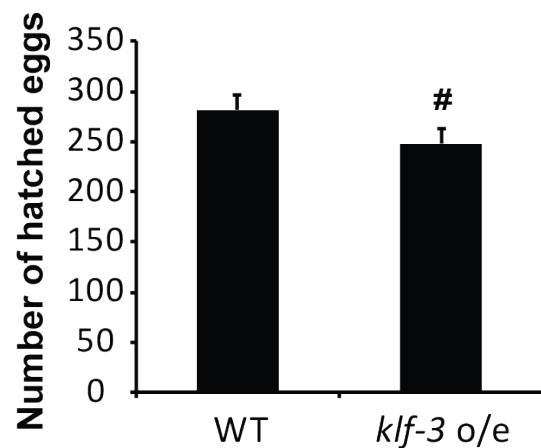

**Supplementary Figure 4. Overexpression of *klf-3* does not strongly change total number of hatched eggs laid.** Average number of viable eggs laid over the entire life of the N2 animals ( $281.5 \pm 14.2$ , N=15) compared to *klf-3 o/e* animals ( $248.0 \pm 15.2$ , N=15). Data is also represented in Fig 2F. # represents P-value<0.1 by Students T-test. Error bars represent standard error of the mean.

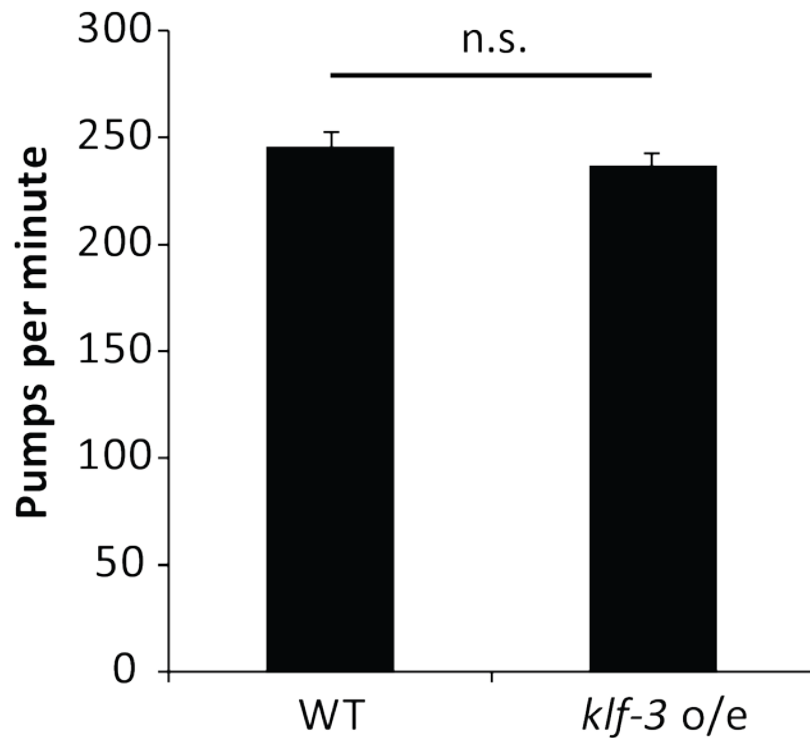

**Supplementary Figure 5. Overexpression of *klf-3* does not significantly alter pharyngeal pumping rates.** Pharyngeal pumping was assayed in day 1 WT (N=10) and *klf-3 o/e* (N=10) worms on OP50. Further details in Methods. N.S. = not significant. P-value>0.05 by Students T-test. Error bars represent standard error of the mean.

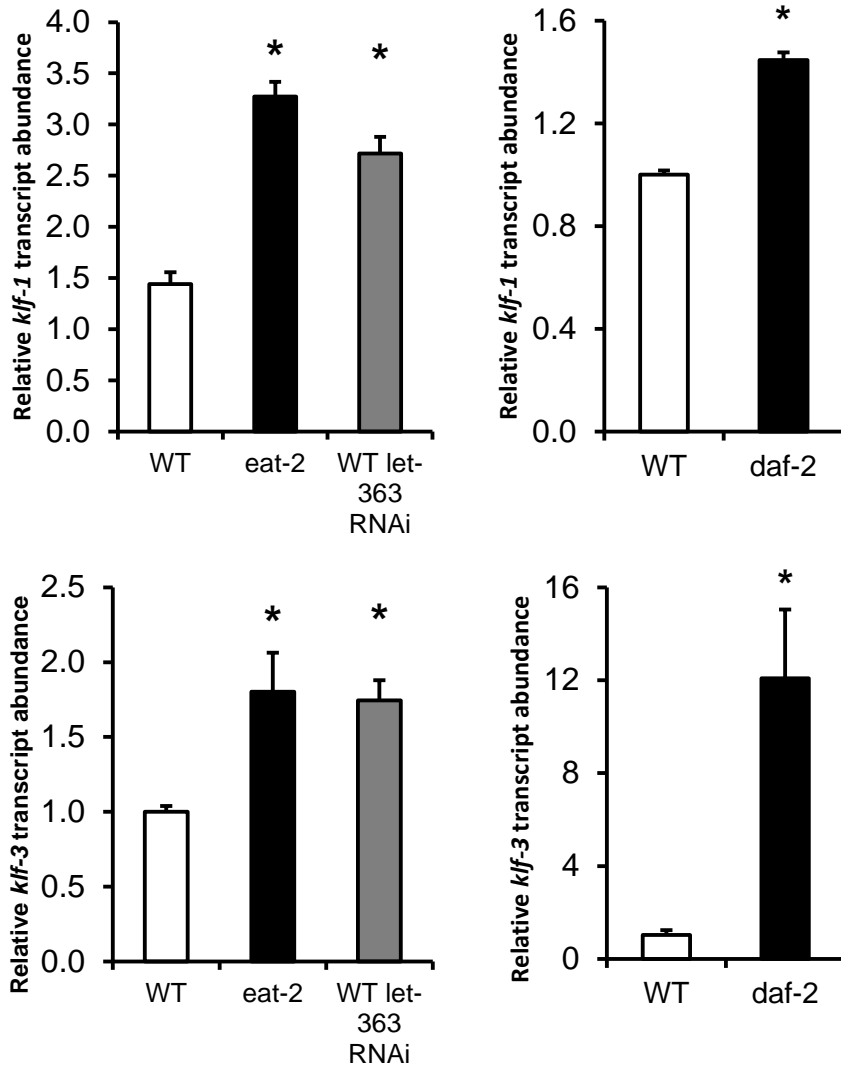

**Supplementary Figure 6. Both *kif-1* and *kif-3* are induced in *eat-2* animals and by inhibition of TOR at age Day 12.** qPCR analysis of *eat-2(ad1116)*, *daf-2(e1370)* and WT worms subjected to RNAi against *let-363*. Significance determined by Student's t-test, p-value < 0.05. N=3 biological replicates. Error bars represent standard error of the mean.

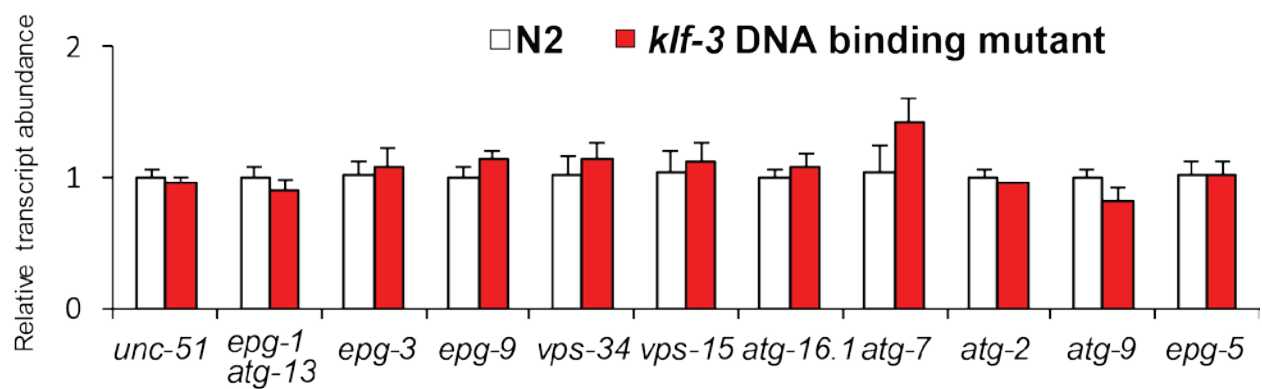

**Supplementary Figure 7. Loss of DNA binding region abolishes *klf-3* mediated enhancement of autophagy gene expression.** Gene expression of assessed autophagy genes is nonsignificantly different comparing wild-type worms with worms overexpressing *klf-3* with zinc-finger containing region deleted. Significance determined by Student's t-test,  $p$ -value > 0.05. N=3 biological replicates. Error bars represent standard error of the mean.

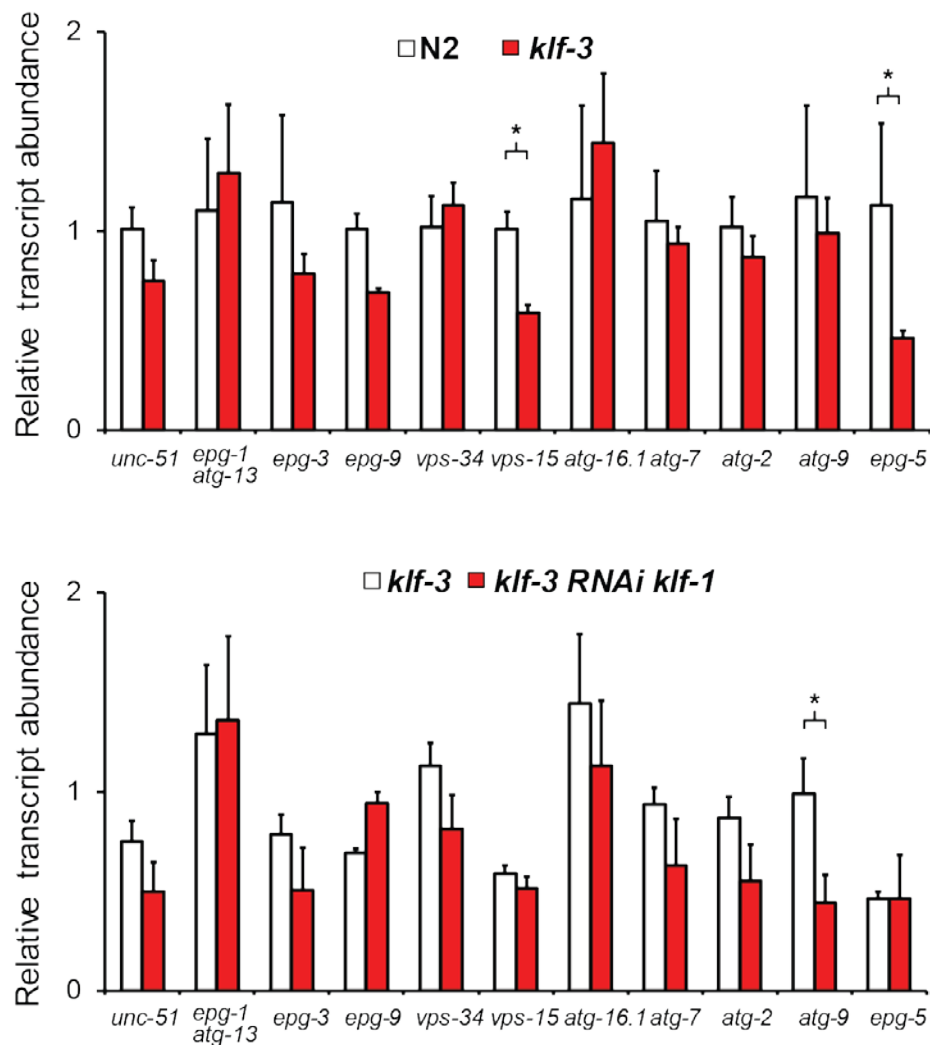

**Supplementary Figure 8. *Klf-3* mutants do not strongly suppress autophagy gene expression, and concurrent RNAi inactivation of *klf-1* in *klf-3* mutants weakly reduces expression.** Additional comparisons using data displayed in Fig. 3C are shown. Gene expression of assessed autophagy genes is only modestly different comparing wild-type worms with *klf-3(ok1975)* mutants and *klf-3(ok1975)* mutants with *klf-3(ok1975)* mutants fed RNAi targeting *klf-1*. Significance determined by Student's t-test, p-value<0.05. N=3 biological replicates. Error bars represent standard error of the mean.



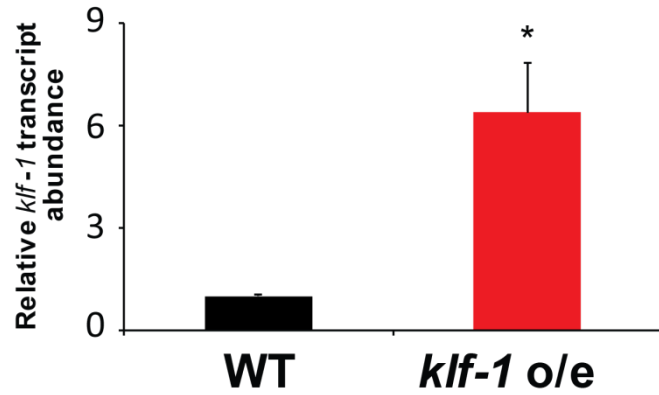

**Supplementary Figure 9. *Klf-1* overexpression driven by *ges-1* promoter.** *klf-1* transcript levels in *klf-1 o/e* animals overexpressing *klf-1* driven by *ges-1* promoter as determined by qPCR (N=3). Significance determined by Student's T-test, p-value <0.05. N=3 biological replicates. Error bars represent standard error of the mean.

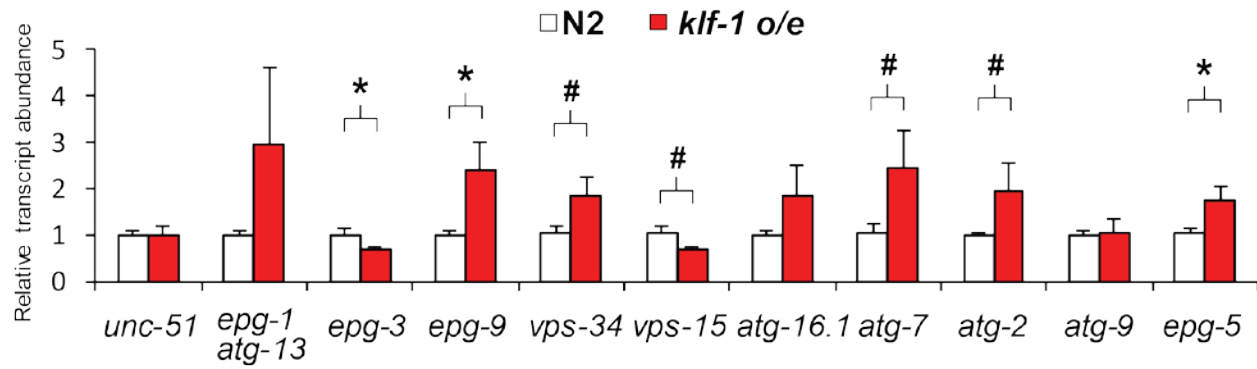

**Supplementary Figure 10. *Klf-1* overexpression driven by *ges-1* promoter increases autophagy gene expression.** Gene expression of assessed autophagy genes is shown comparing wild-type worms with *klf-1 o/e* worms. Significance determined by Student's t-test, #p-value<0.01, \*p-value<0.05. N=3 biological replicates. Error bars represent standard error of the mean.

WT

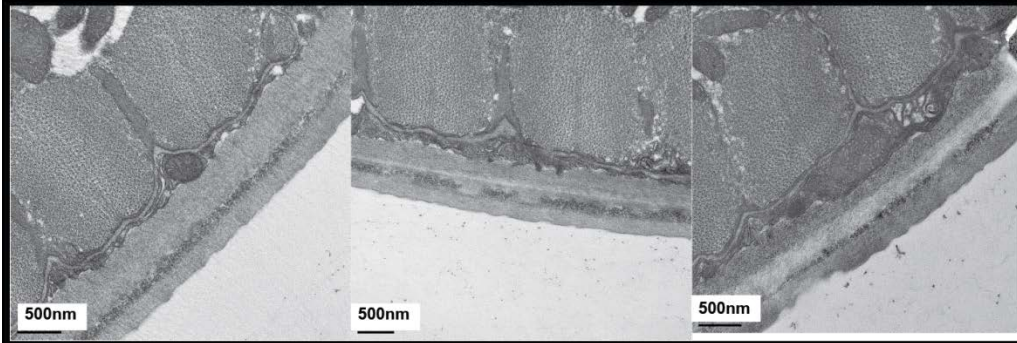

Day 5

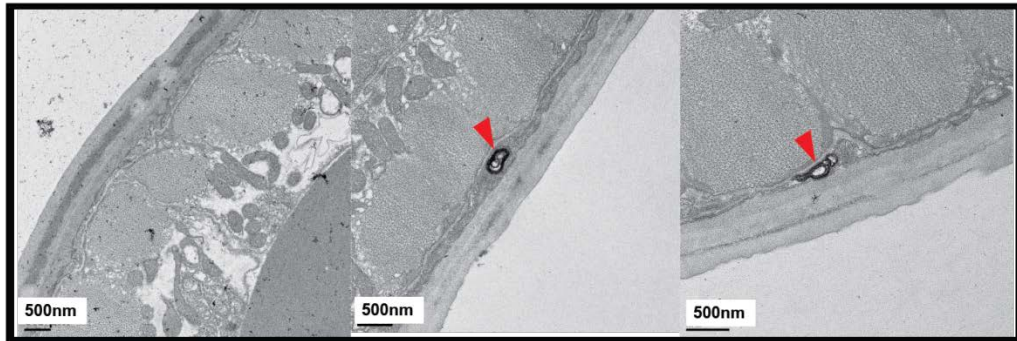

Day 9

*klf-3* o/e

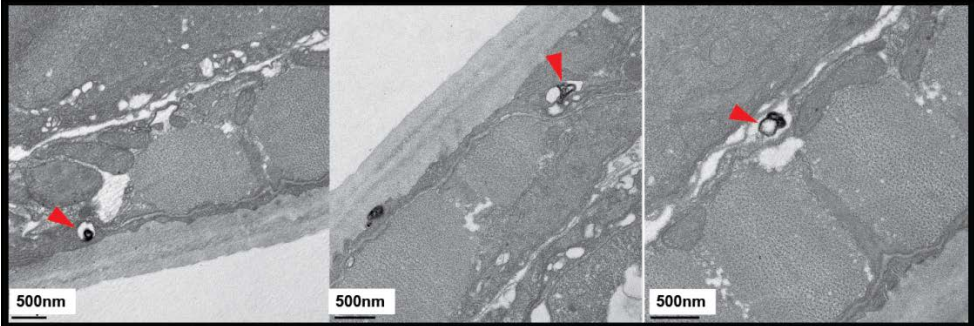

Day 5

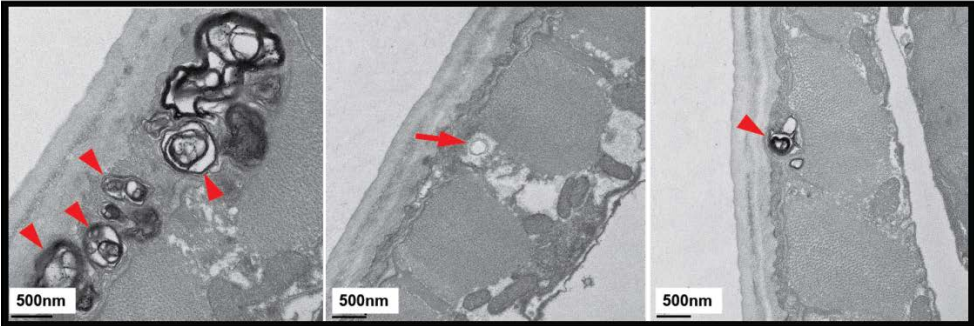

Day 9

*klf-3* RNAi *klf-1*

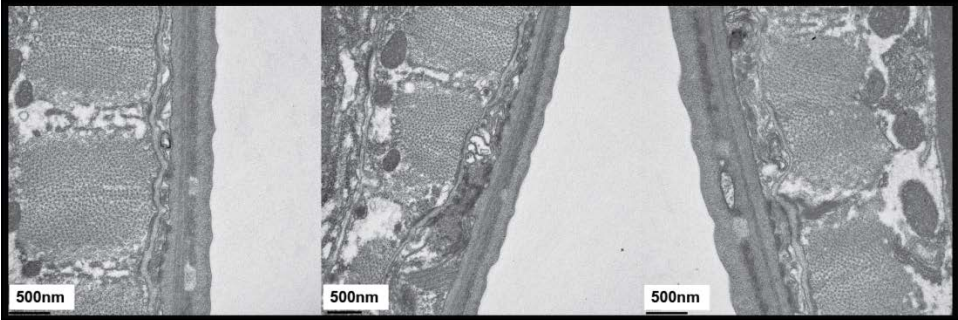

Day 5

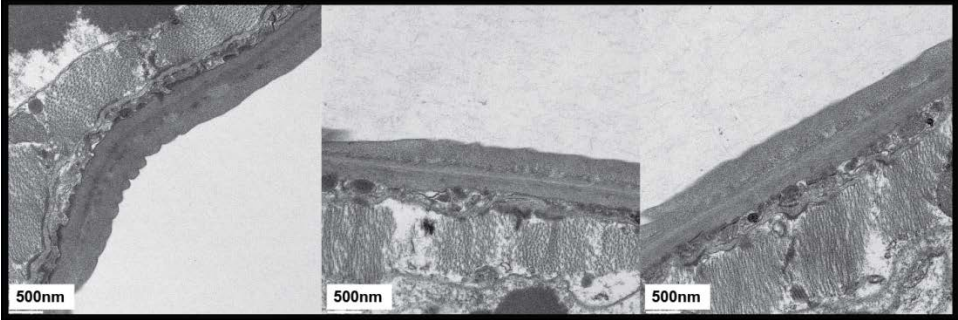

Day 9

Supplementary Figure 11. Little to no autophagic-like vesicles presence in wild-type and *klf-3* RNAi *klf-1* animals by TEM at Day 5 or Day 9 (post-fertile period).

10-20 transverse sections were taken from animals (n=5) and analyzed; majority of images were void of autophagic vesicles. Sections of *klf-3 o/e* worms are shown for comparison, and are reproduced in Fig. 3F-G. Scale indicated by horizontal bar (500nm), three representative sections from separate animals are shown. Typical autophagic-like vesicle with a double limiting membrane (arrows); autophagic-like vesicle and several autolysosomes (arrowheads).

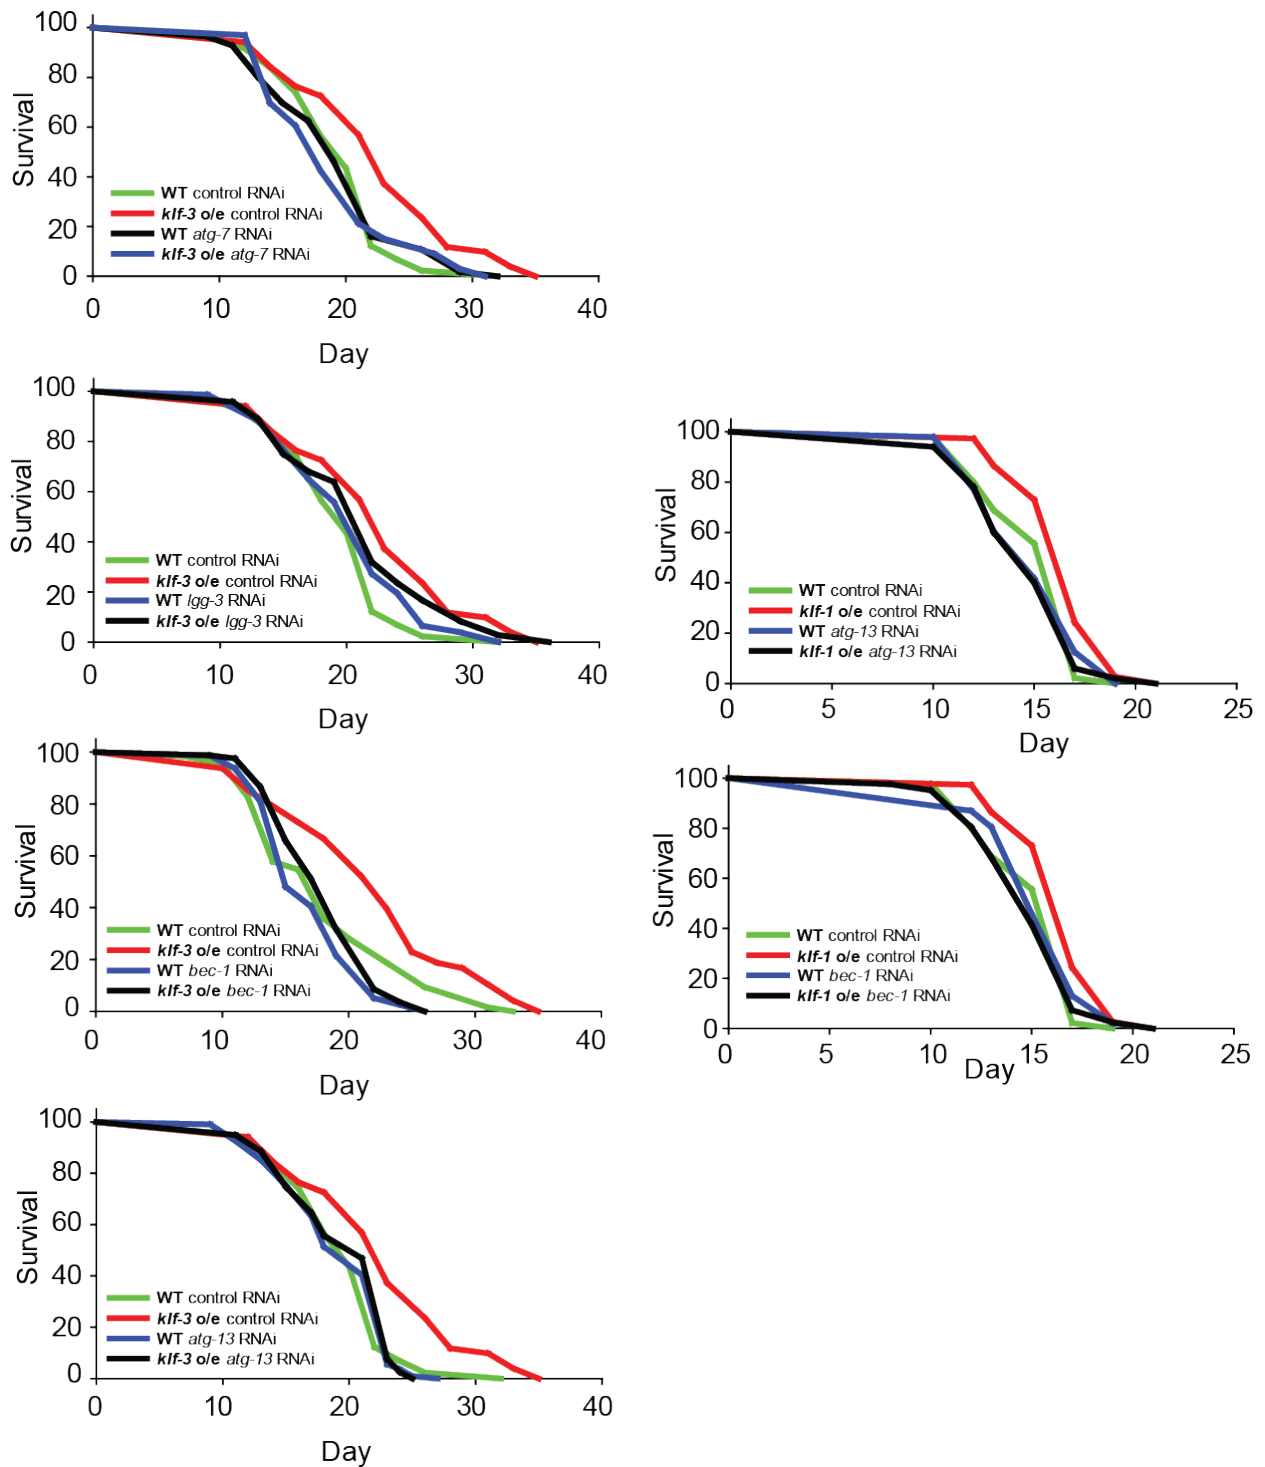

**Supplementary Figure 12. KLF-mediated lifespan extension is autophagy dependent.** Lifespan analysis of *klf-3 o/e* and *klf-1 o/e* worms fed RNAi targeting empty vector, *bec-1*, *lgg-3*, *atg-13*, or *atg-7*. Representative traces are displayed from a single experiment. *Klf-1 o/e* experiments were performed in two independent lines. P-value calculated by Mantel-Cox log-rank tests. Lifespan traces for *klf-3 o/e* and WT with RNAi

against *bec-1* are reproduced from Fig. 3H. See also Supplementary Table 6 for replicates.

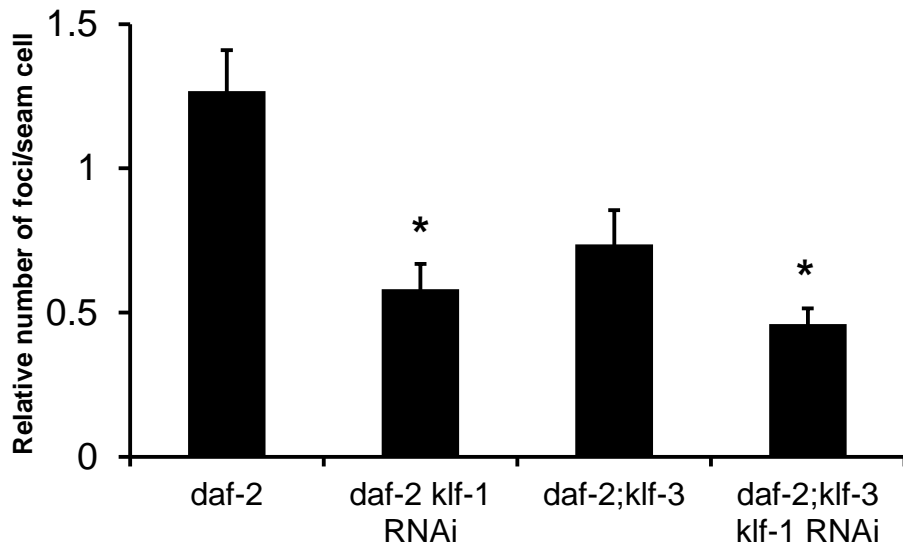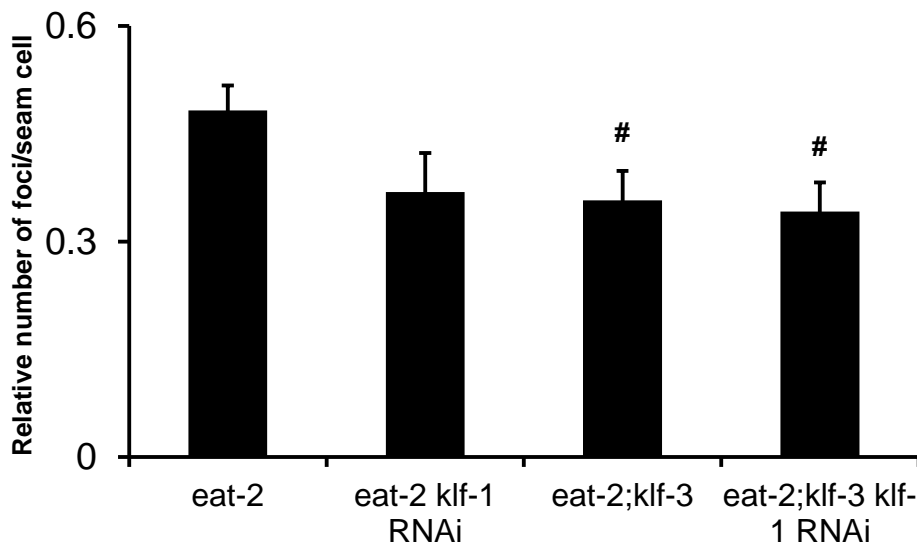

**Supplementary Figure 13. Autophagy is decreased in *daf-2* or *eat-2* animals with single or compound deficiency of *klf-1* and *klf-3*.** *Daf-2(e1370)*, *eat-2(ad1116)*, *daf-2;klf-3*, *eat-2;klf-3* animals were fed *klf-1* RNAi from birth until L4 stage and all images were taken at L4. Compound deficiency of *klf-1* and *klf-3* most severely suppresses autophagy in *daf-2(e1370)* animals, but is nonsignificantly different from single deficiency in *eat-2(ad1116)* animals. 30-150 seams cells were counted in 10-20 animals in each group. \* represents P-value<0.05, # represents P-value<0.1 by Students T-test. Error bars represent standard error of the mean.



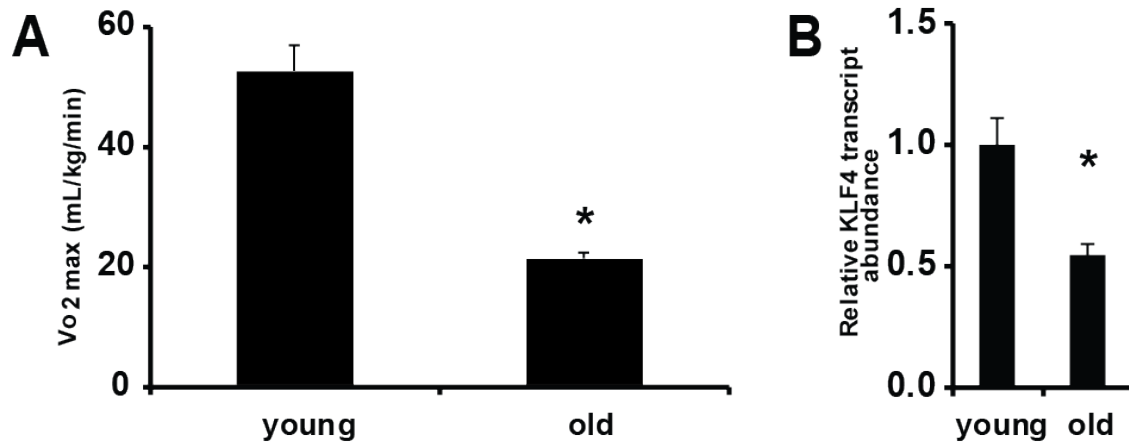

**Supplementary Figure 14. VO<sub>2</sub>max and KLF4 levels decrease with age in humans.** (A) Maximal oxygen consumption (VO<sub>2max</sub>) in young and old patients. N=5 patients per group. \* represents P-value<0.05 by Students T-test. Further details in Methods Section. (B) qPCR analysis of skeletal muscle biopsies (whole tissue) in young (20-40 years old) and aged (50-70 years old) patients. N=5 patients per group. \* represents P-value<0.05 by Students T-test. Error bars represent standard error of the mean.

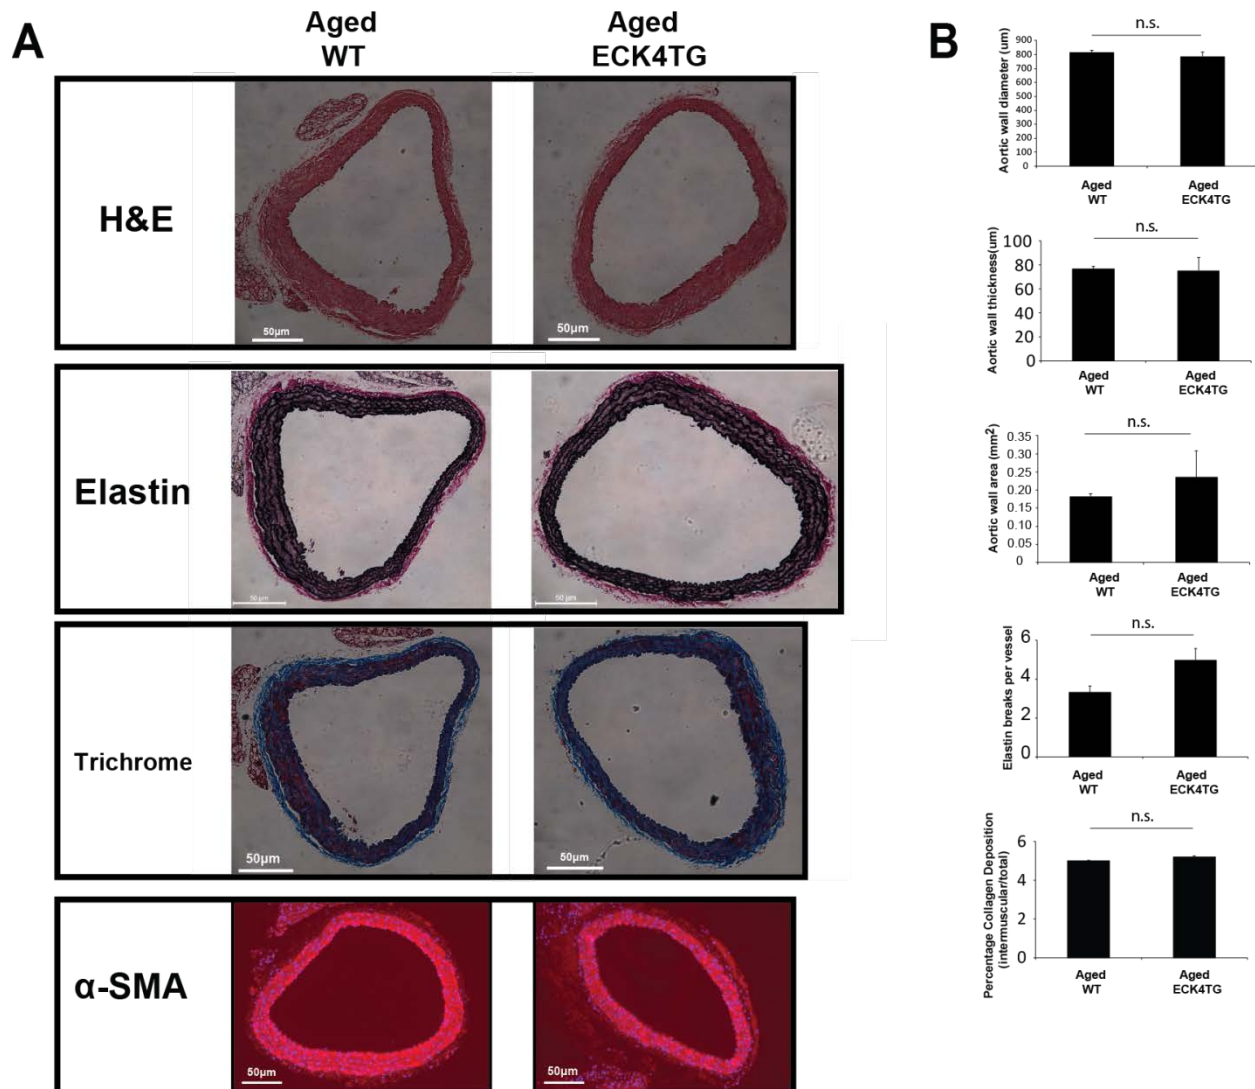

**Supplementary Figure 15. Structural wall components are unchanged in aged WT versus aged ECK4TG mice.**

(A) Representative aortic sections from aged (12-14 months) WT and ECK4TG mice, N=3 per group. Top, hematoxylin and eosin staining, upper middle, elastin staining, lower middle, trichrome staining, bottom, antibody against  $\alpha$ -smooth muscle actin (red) with 4',6-diamidino-2-phenylindole (DAPI, blue) counterstaining to identify nuclei. Sections were taken at the T2 level of the thoracic aorta. All images were taken at 100x magnification. Scale bar, 50 $\mu$ m. (B) Quantitative morphometry (lumen diameter, aortic wall thickness, aortic wall area), and quantification of elastin degradation and collagen deposition of perfusion-fixed aortic cross sections from aged (12-14 months) WT and ECK4TG mice, N=3 per group. N.S. = non-significant by Student's T-test. Further details in Methods Section. Error bars represent standard error of the mean.

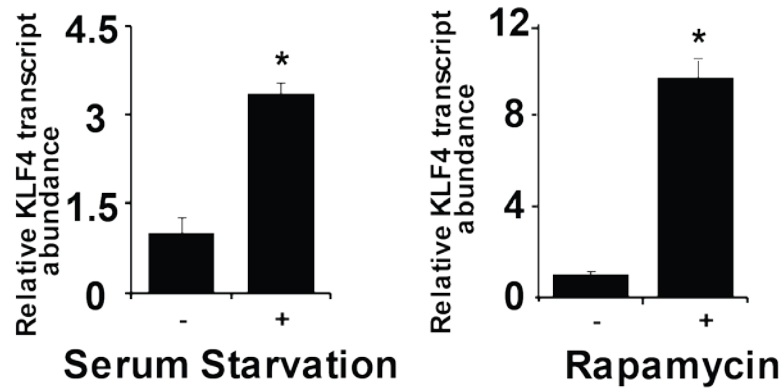

**Supplementary Figure 16. KLF4 is induced in HUVECs by serum starvation and rapamycin.** Rapamycin treatment (20ug/mL) (A) and serum starvation (B) induce KLF4 expression. Cells were incubated in rapamycin 24 hours before harvest. Starvation was accomplished via replacement of media with DPBS for the 1 hour before harvest. \*P-value<0.05 by Student's T-test. N=3 biological replicates. Error bars represent standard error of the mean.

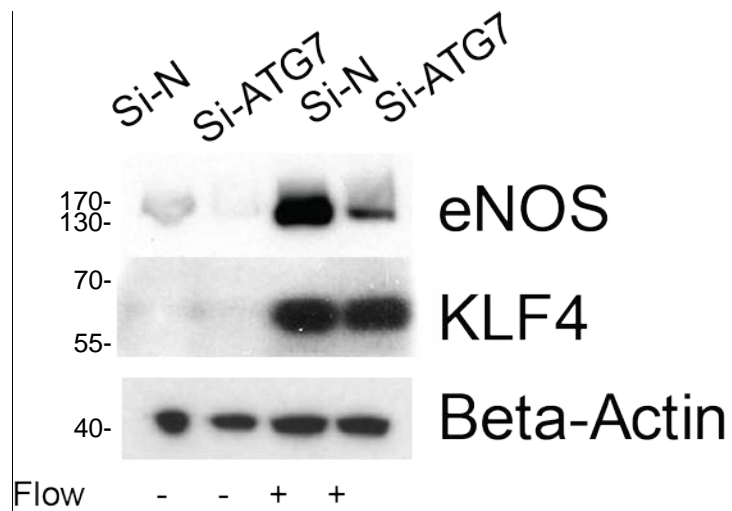

**Supplementary Figure 17. Flow-induced eNOS expression is autophagy dependent** HUVECs were subjected to siRNA against *Atg7* for 48 hours, then to static or laminar flow (shear stress of 17 dyne/cm<sup>2</sup>) for an additional 24 hours prior to harvest. Representative blot is shown from two independent experiments. Further details in Methods section.

A

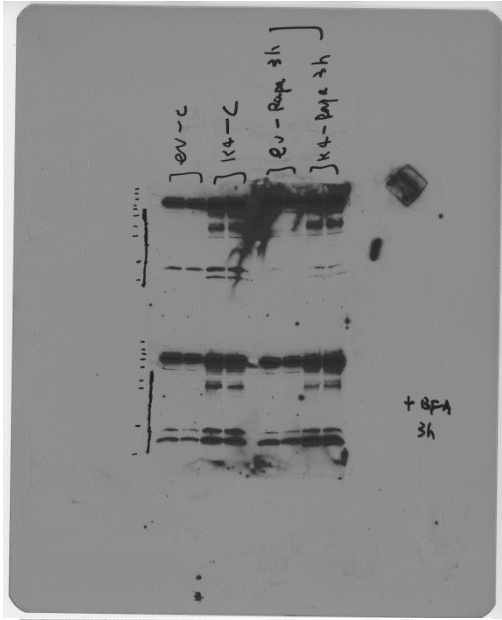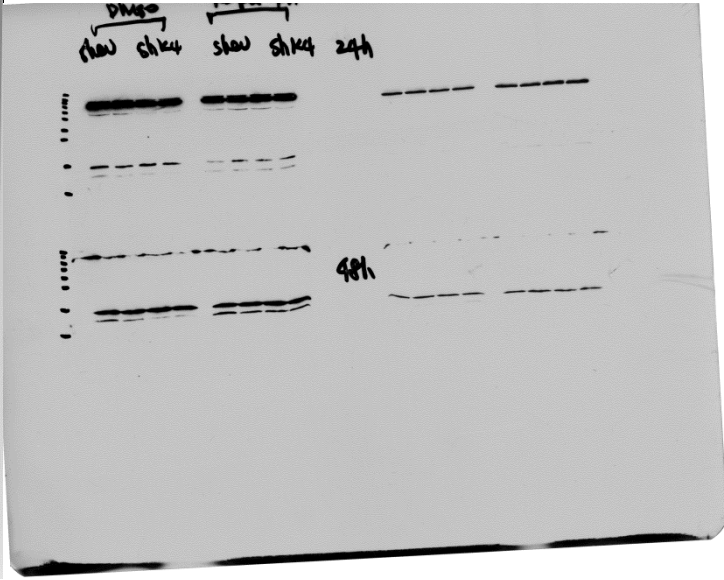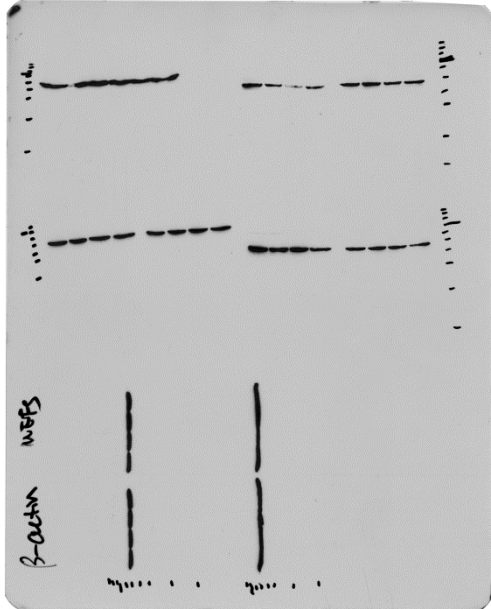

**B**

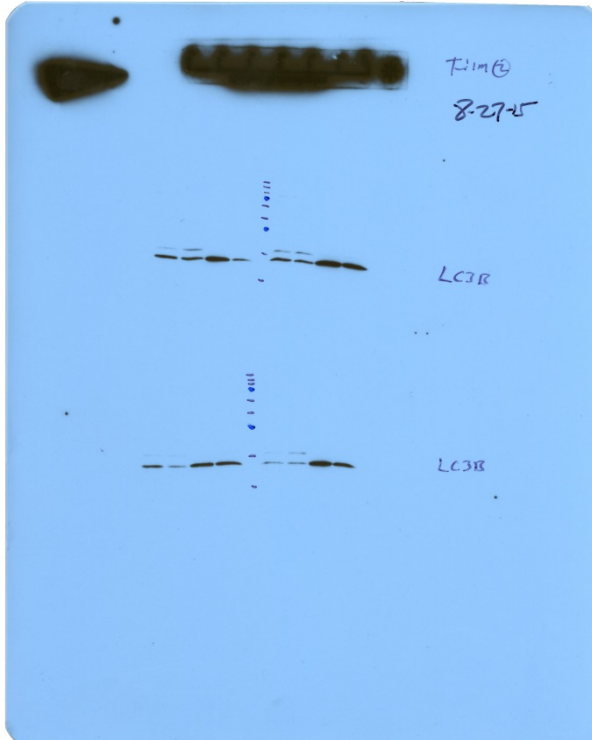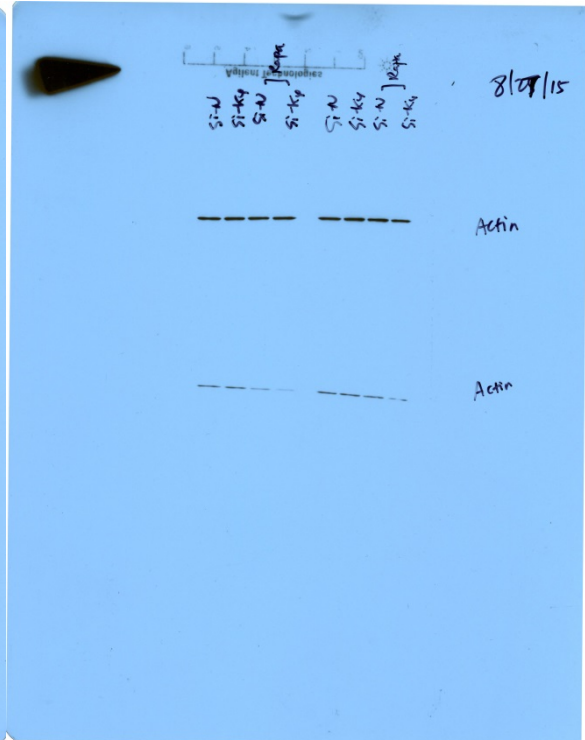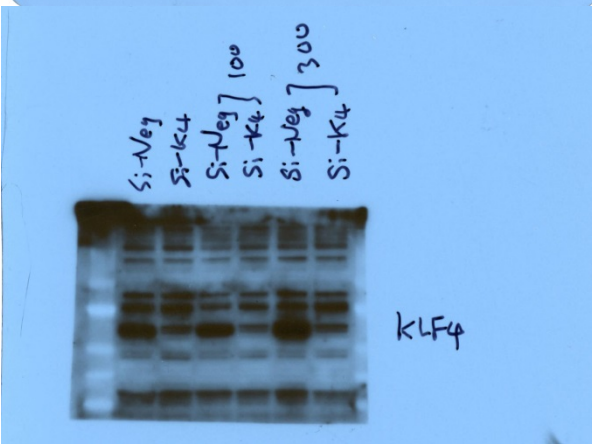

C

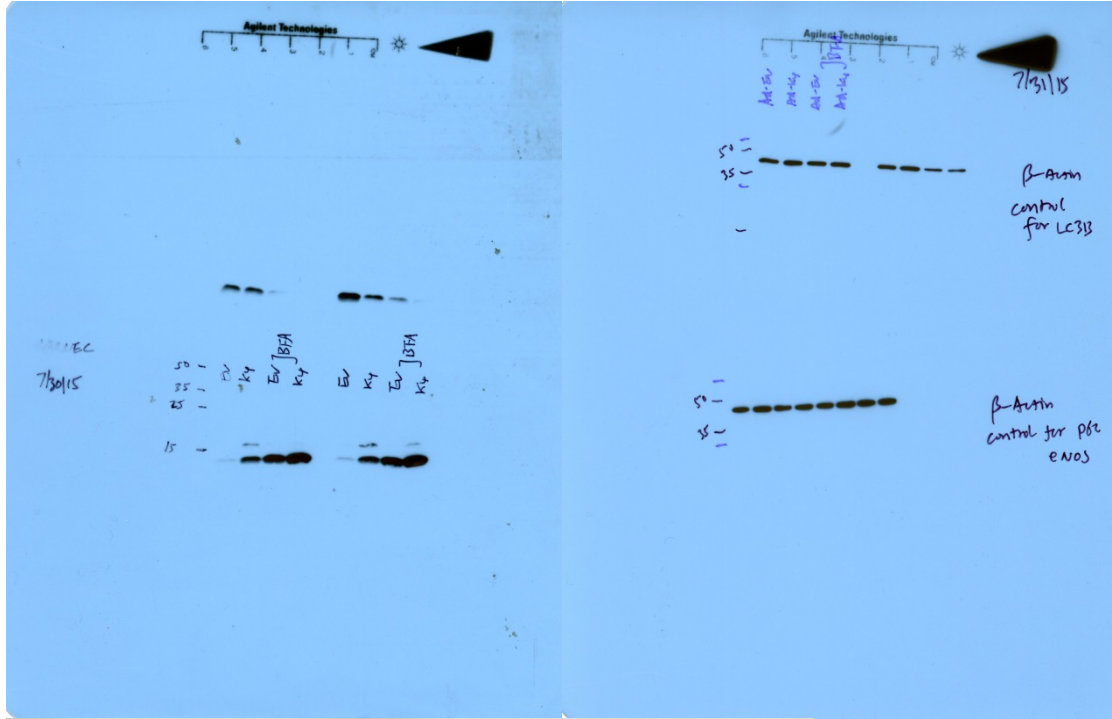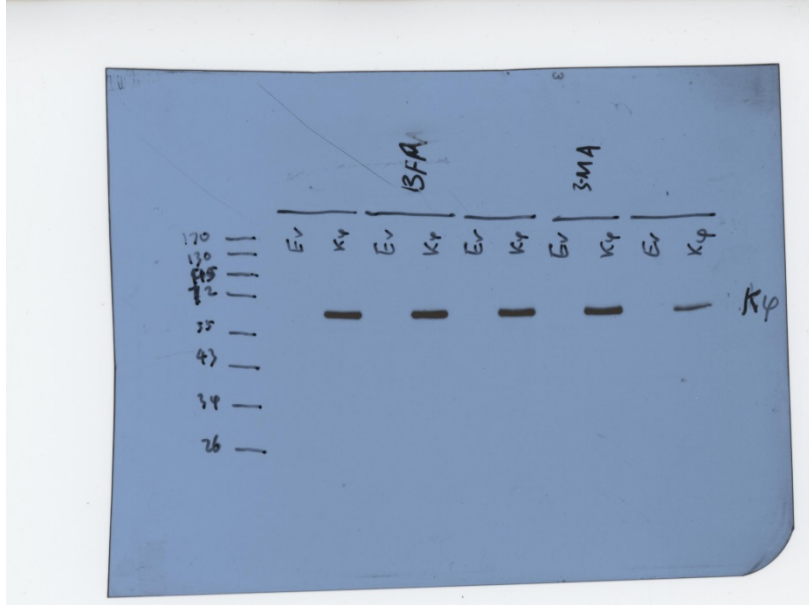

D

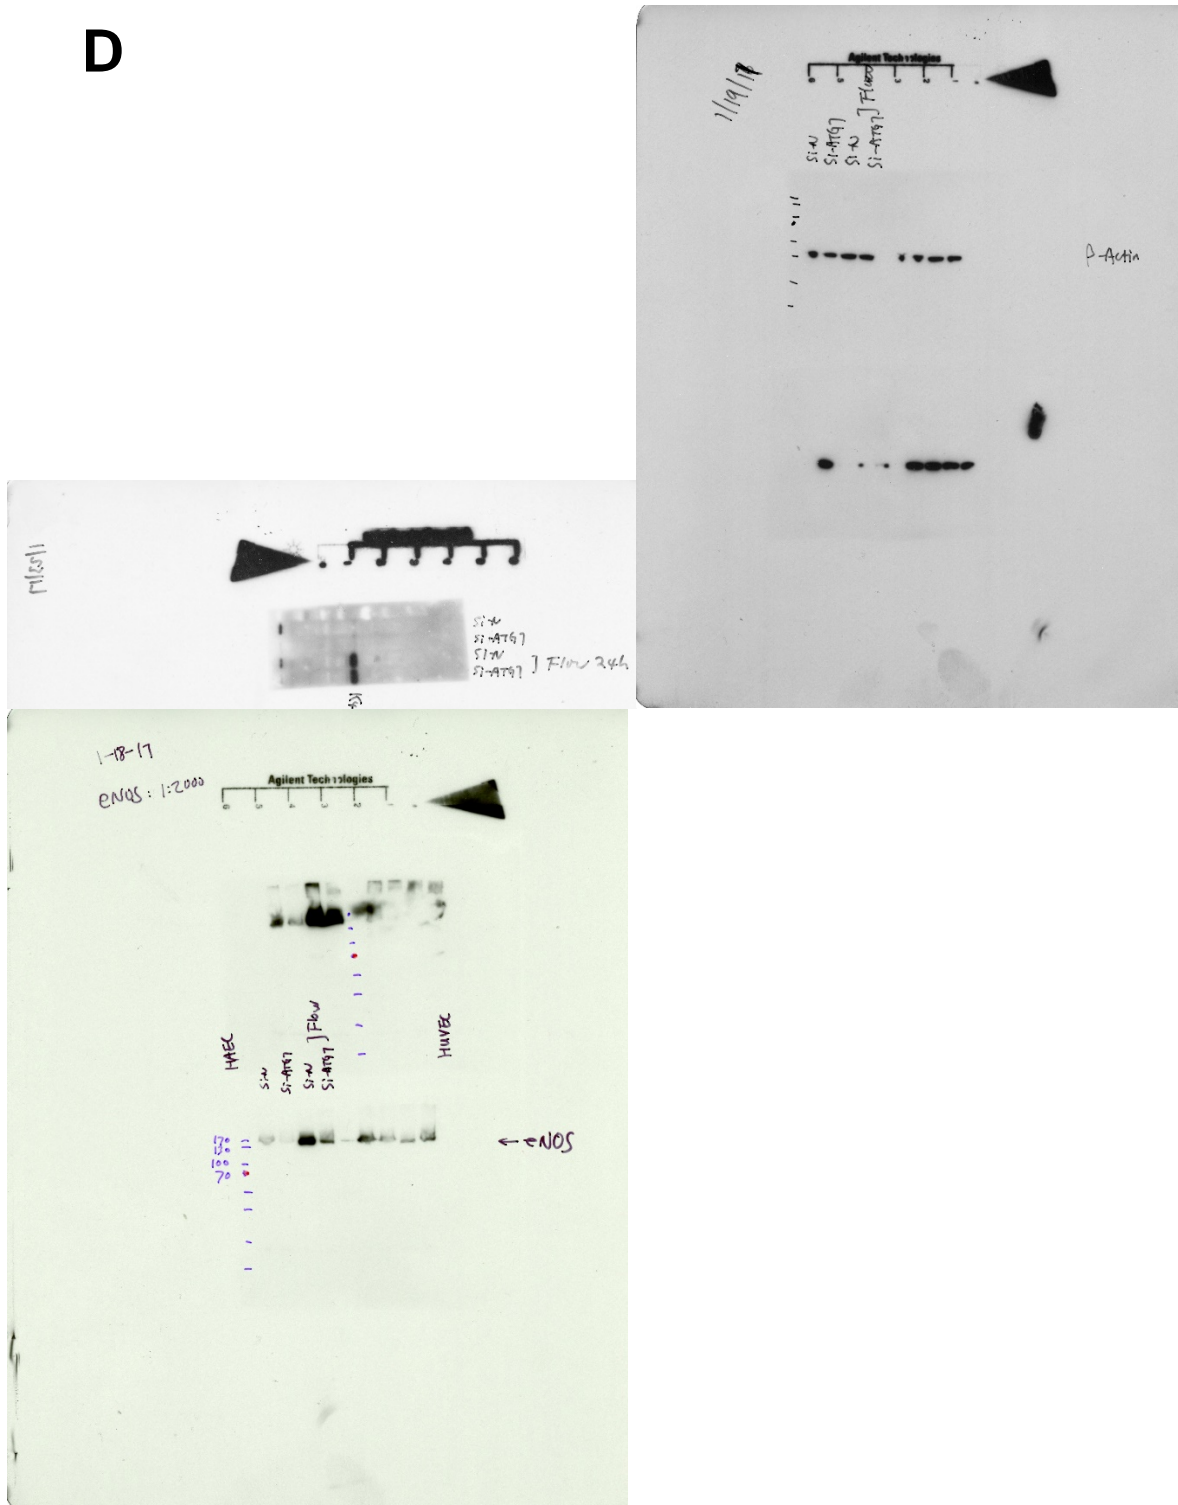

**Supplementary Figure 18.** Full scans of western blots. (A) LC3-I lipidation assay in MEFs with overexpression of knockdown of KLF4. Cropped data presented in Figure 4C (B) LC3-I lipidation assay in HUVECs with knockdown of KLF4. Cropped data presented



in Figure 5G (C) LC3-I lipidation assay in HUVECs with overexpression of KLF4. Cropped data presented in Figure 5G. (D) Western blots of eNOS, KLF4 and actin expression with and without laminar shear stress. Cropped data presented in Supplementary Figure 17.

| RNAi started in adulthood | Vector Control RNAi | <i>klf-1</i> RNAi | <i>klf-2</i> RNAi | <i>klf-3</i> RNAi |
|---------------------------|---------------------|-------------------|-------------------|-------------------|
| N2                        |                     | ↓                 | —                 | —                 |
| <i>klf-1(tm731)</i>       | —                   | NA                | —                 | ↓↓                |
| <i>klf-2(ok1043)</i>      | —                   | ↓↓                | NA                | ↓                 |
| <i>klf-3(ok1975)</i>      | —                   | ↓↓                | —                 | NA                |

| RNAi started from hatching | Vector Control RNAi | <i>klf-1</i> RNAi | <i>klf-2</i> RNAi | <i>klf-3</i> RNAi |
|----------------------------|---------------------|-------------------|-------------------|-------------------|
| N2                         |                     | ↓                 | —                 | Lethal            |
| <i>klf-1(tm731)</i>        | —                   | NA                | ↓                 | Lethal            |
| <i>klf-2(ok1043)</i>       | —                   | ↓↓                | NA                | Lethal            |
| <i>klf-3(ok1975)</i>       | —                   | ↓↓↓               | —                 | NA                |

**Supplementary Table 1. Summary table of combinatorial lifespan analysis of double KLF loss of function.** Complete data in Supplementary table 2. Each single arrow represents approximately 10% loss of lifespan. Horizontal bars represent nonsignificant difference. NA = not attempted.

| Strains               | RNAi treatments                        | Avg lifespan $\pm$ s.e.m. (Days) | Number of animals | 25% (Days) | 50% (Days) | 75% (Days) | % change | P-value vs control |
|-----------------------|----------------------------------------|----------------------------------|-------------------|------------|------------|------------|----------|--------------------|
| N2                    | OP50                                   | 18.586 $\pm$ 0.781               | 65/90             | 23         | 18         | 14         |          |                    |
|                       | Vector control                         | 18.608 $\pm$ 0.661               | 79/86             | 23         | 18         | 14         |          |                    |
|                       | <i>klf-1</i>                           | 16.322 $\pm$ 0.630               | 68/90             | 20         | 14         | 12         | -12      | <b>0.017</b>       |
|                       |                                        | 15.988 $\pm$ 0.590               | 81/90             | 18         | 14         | 12         | -14      | <b>0.004</b>       |
|                       | <i>klf-2</i>                           | 17.934 $\pm$ 0.588               | 68/90             | 23         | 16         | 14         | -4       | 0.388              |
|                       |                                        | 19.638 $\pm$ 0.629               | 77/90             | 23         | 20         | 16         | +6       | 0.443              |
|                       | <i>klf-3</i>                           | 17.927 $\pm$ 0.819               | 48/90             | 23         | 16         | 14         | -4       | 0.540              |
| <i>klf-1</i> (tm731)  | OP50                                   | 19.869 $\pm$ 0.608               | 81/90             | 24         | 21         | 14         | +7       | 0.528              |
|                       | Vector control                         | 19.869 $\pm$ 0.608               | 81/90             | 24         | 21         | 14         |          |                    |
|                       | <i>klf-2</i>                           | 20.432 $\pm$ 0.571               | 82/90             | 26         | 21         | 16         | +3       | 0.490              |
|                       | <i>klf-3</i> (from birth) (from adult) | lethal<br>17.336 $\pm$ 0.608     | 65/90             | 21         | 16         | 14         | -13      | <b>0.002</b>       |
| <i>klf-2</i> (ok1043) | OP50                                   | 19.250 $\pm$ 0.586               | 56/90             | 24         | 19         | 16         | +4       | 0.893              |
|                       | Vector control                         | 19.236 $\pm$ 0.588               | 56/90             | 24         | 19         | 16         |          |                    |
|                       |                                        | 19.161 $\pm$ 0.470               | 57/90             | 22         | 22         | 19         |          |                    |
|                       | <i>klf-1</i> (from birth) (from adult) | 15.661 $\pm$ 0.585               | 40/90             | 19         | 16         | 13         | -18      | <b>&lt;0.001</b>   |
|                       |                                        | 15.149 $\pm$ 0.617               | 56/90             | 17         | 14         | 12         | -20      | <b>&lt;0.001</b>   |
|                       | <i>klf-3</i> (from birth) (from adult) | Lethal<br>17.593 $\pm$ 0.424     | 74/90             | 21         | 17         | 16         | -9       | <b>0.012</b>       |
| <i>klf-3</i> (ok1976) | OP50                                   | 19.829 $\pm$ 0.714               | 57/90             | 26         | 19         | 16         | +7       | 0.478              |
|                       | Vector control                         | 19.829 $\pm$ 0.714               | 57/90             | 26         | 19         | 16         |          |                    |
|                       |                                        | 18.466 $\pm$ 0.642               | 55/90             | 22         | 22         | 16         |          |                    |
|                       | <i>klf-1</i> (from birth) (from adult) | 13.681 $\pm$ 0.567               | 38/90             | 16         | 13         | 10         | -26      | <b>&lt;0.001</b>   |
|                       |                                        | 15.876 $\pm$ 0.618               | 55/90             | 19         | 16         | 14         | -20      | <b>&lt;0.001</b>   |
|                       | <i>klf-2</i> (from birth) (from adult) | 19.000 $\pm$ 0.364               | 60/90             | 22         | 19         | 19         | +3       | 0.362              |
|                       |                                        | 19.344 $\pm$                     | 56/90             | 24         | 19         | 14         | -2       | 0.420              |

**Supplementary Table 2. Combinatorial lifespan analysis of *C. elegans* animals with reduced *klf-1*, *klf-2* or *klf-3* levels.** Results of lifespan analysis of wild-type (WT, N2) and mutant animals (*klf-1*, *klf-2* and *klf-3*). Animals were raised and incubated at 20°C and fed control bacteria or bacteria expressing dsRNA against *klf-1*, *klf-2* or *klf-3* beginning at adulthood. The *klf-1(tm731)* mutant contains a 343-bp intronic deletion with no obvious abnormalities, likely hypomorphic. The *klf-2(ok1043)* mutant contains an estimated 1500-bp deletion. The *klf-3(ok1975)* loss-of-function mutant contains a 1658-bp deletion spanning the 3' end of exon 2 through the 5' end of exon 3. Data show the average lifespan, number of events, day at which 25, 50 or 75% of animals remained alive, % change, and p value vs control calculated by Mantel-Cox log-rank test.

| Strains/Regimen                         | RNAi treatments | Avg lifespan ± s.e.m. (Days) | Number of animals | 25% (Days) | 50% (Days) | 75% (Days) | % change | P-value vs control |
|-----------------------------------------|-----------------|------------------------------|-------------------|------------|------------|------------|----------|--------------------|
| N2 Rapamycin                            | Vector Control  | 21.594±0.517                 | 69/90             | 24         | 20         | 20         |          |                    |
|                                         |                 | 23.253±0.741                 | 79/90             | 27         | 23         | 17         |          |                    |
|                                         | <i>klf-1</i>    | 24.407±0.637                 | 81/90             | 28         | 26         | 21         |          |                    |
|                                         |                 | 19.424±0.463                 | 66/90             | 22         | 18         | 18         | -10      | <b>0.0070</b>      |
|                                         |                 | 19.355±0.588                 | 62/90             | 21         | 19         | 17         | -16      | <b>&lt;0.001</b>   |
|                                         |                 | 18.290±0.533                 | 69/90             | 21         | 18         | 14         | -25      | <b>&lt;0.001</b>   |
| <i>klf-3</i> Rapamycin                  | Vector Control  | 19.571±0.477                 | 56/90             | 22         | 20         | 18         | -9       | <b>0.0076</b>      |
|                                         |                 | 20.534±0.680                 | 58/90             | 23         | 19         | 17         | -11      | <b>0.0140</b>      |
|                                         | <i>klf-1</i>    | 18.729±0.660                 | 48/90             | 21         | 18         | 16         | -23      | <b>&lt;0.001</b>   |
|                                         |                 | 17.969±0.493                 | 65/90             | 20         | 18         | 16         | -17      | <b>&lt;0.001</b>   |
|                                         |                 | 17.552±0.423                 | 67/90             | 19         | 17         | 17         | -25      | <b>&lt;0.001</b>   |
|                                         |                 | 18.268±0.439                 | 71/90             | 21         | 18         | 16         | -25      | <b>&lt;0.001</b>   |
| N2 solid agar dietary restriction (sDR) | Vector Control  | 27.081±1.383                 | 74/90             | 34         | 26         | 15         |          |                    |
|                                         |                 | 27.043±0.980                 | 70/90             | 32         | 28         | 22         |          |                    |
|                                         | <i>klf-1</i>    | 33.368±0.876                 | 68/90             | 38         | 34         | 30         |          |                    |
|                                         |                 | 20.652±1.074                 | 69/90             | 26         | 20         | 13         | -24      | <b>0.0020</b>      |
|                                         |                 | 22.020 ± 0.906               | 50/90             | 26         | 22         | 18         | -18      | <b>0.0013</b>      |
|                                         |                 | 23.116 ± 0.961               | 69/90             | 28         | 24         | 18         | -31      | <b>&lt;0.001</b>   |
| <i>klf-3</i> sDR                        | Vector Control  | 22.197±1.25                  | 66/90             | 30         | 20         | 13         | -18      | <b>0.0595</b>      |
|                                         |                 | 26.143±1.318                 | 49/90             | 34         | 26         | 20         | -3       | 0.964              |
|                                         | <i>klf-1</i>    | 26.949±1.457                 | 39/90             | 36         | 26         | 22         | -19      | <b>0.0022</b>      |
|                                         |                 | 21.485±1.030                 | 66/90             | 28         | 20         | 15         | -21      | <b>0.0060</b>      |
|                                         |                 | 26.667±1.048                 | 51/90             | 32         | 26         | 22         | -1       | 0.992              |
|                                         |                 | 24.861±1.005                 | 36/90             | 28         | 26         | 22         | -25      | <b>&lt;0.001</b>   |
| <i>eat-2</i>                            | Vector Control  | 27.508 ±0.985                | 61/90             | 34         | 28         | 22         |          |                    |
|                                         |                 | 25.648±1.062                 | 54/90             | 31         | 25         | 19         |          |                    |
|                                         | <i>klf-1</i>    | 23.702±0.838                 | 57/90             | 28         | 24         | 18         |          |                    |
|                                         |                 | 20.551±0.621                 | 69/90             | 24         | 22         | 18         | -19      | <b>&lt;0.001</b>   |
|                                         |                 | 16.920±0.702                 | 50/90             | 21         | 17         | 13         | -34      | <b>&lt;0.001</b>   |
|                                         |                 | 16.821±0.710                 | 56/90             | 18         | 16         | 11         | -29      | <b>&lt;0.001</b>   |
| <i>eat-2;klf-3</i>                      | Vector Control  | 19.130±0.936                 | 46/90             | 24         | 18         | 14         | -30      | <b>&lt;0.001</b>   |
|                                         |                 | 20.770±0.832                 | 61/90             | 25         | 21         | 17         | -20      | <b>&lt;0.001</b>   |
|                                         | <i>klf-1</i>    | 19.875±1.175                 | 24/90             | 22         | 18         | 16         | -16      | <b>0.0458</b>      |
|                                         |                 | 8.435±0.677                  | 23/90             | 8          | 8          | 6          | -70      | <b>&lt;0.001</b>   |
|                                         |                 | 14.975±0.648                 | 81/170            | 19         | 13         | 11         | -42      | <b>&lt;0.001</b>   |
|                                         |                 | 18.821 ± 1.104               | 39/90             | 26         | 18         | 13         | -20      | <b>0.0085</b>      |
| <i>daf-2</i>                            | Vector Control  | 56.083±1.244                 | 121/150           | 66         | 56         | 48         |          |                    |
|                                         |                 | 50.101±1.584                 | 79/90             | 62         | 52         | 40         |          |                    |

|                    |              |              |        |    |    |    |     |        |
|--------------------|--------------|--------------|--------|----|----|----|-----|--------|
|                    | <i>klf-1</i> | 33.043±2.652 | 23/150 | 42 | 32 | 22 | -41 | <0.001 |
|                    |              | 21.5±1.23    | 36/90  | 26 | 20 | 16 | -57 | <0.001 |
| <i>daf-2;klf-3</i> | Vector       | 41.849±1.359 | 93/150 | 52 | 46 | 32 | -25 | <0.001 |
|                    | Control      |              |        |    |    |    |     |        |
|                    |              | 34.364±3.334 | 11/90  | 44 | 38 | 20 | -31 | <0.001 |
|                    | <i>klf-1</i> | 23.075±0.759 | 67/150 | 26 | 22 | 20 | -59 | <0.001 |
|                    |              | 17.143±0.957 | 35/90  | 20 | 16 | 14 | -66 | <0.001 |

**Supplementary Table 3: Lifespan analysis of *C. elegans* mutant animals with reduced *klf-1* levels.** Results of lifespan analysis of wild-type (WT, N2) and *klf-3* mutant animals. Animals were raised and incubated at 20°C and fed control bacteria or bacteria expressing dsRNA against *klf-1* beginning at adulthood. Data show the average lifespan, number of events, day at which 25, 50 or 75% of animals remained alive, % change, and p value vs control calculated by Mantel-Cox log-rank test.

| Strains (ng of plasmid injected) | Avg lifespan $\pm$ s.e.m. (Days)                        | Number of animals | 25% (Days) | 50% (Days) | 75% (Days) | % change | P-value vs control |
|----------------------------------|---------------------------------------------------------|-------------------|------------|------------|------------|----------|--------------------|
| N2                               | *17.683 $\pm$ 0.381                                     | 69/90             | 20         | 20         | 15         |          |                    |
|                                  | #17.096 $\pm$ 0.423                                     | 78/90             | 20         | 20         | 15         |          |                    |
|                                  | +17.107 $\pm$ 0.368                                     | 74/90             | 20         | 20         | 15         |          |                    |
|                                  | #21.079 $\pm$ 0.409                                     | 64/90             | 26         | 23         | 18         |          |                    |
|                                  | $\Delta$ 14.946 $\pm$ 0.505                             | 49/60             | 17         | 15         | 13         |          |                    |
|                                  | $^{\circ}$ 19.563 $\pm$ 0.395                           | 131/180           | 22         | 20         | 16         |          |                    |
|                                  | #19.739 $\pm$ 0.636                                     | 33/90             | 22         | 20         | 18         |          |                    |
|                                  | $\phi$ 21.128 $\pm$ 0.413                               | 148/166           | 24         | 22         | 18         |          |                    |
|                                  | $\epsilon$ 14.568 $\pm$ 0.433                           | 44/60             | 17         | 15         | 12         |          |                    |
|                                  | $\zeta$ 14.370 $\pm$ 0.399                              | 54/60             | 17         | 13         | 12         |          |                    |
|                                  | $\theta$ 13.159 $\pm$ 0.409                             | 44/60             | 15         | 13         | 11         |          |                    |
|                                  | $\kappa$ 17.452 $\pm$ 0.266                             | 146/171           | 20         | 17         | 15         |          |                    |
|                                  | $\lambda$ 10.859 $\pm$ 0.313                            | 149/160           | 13         | 9          | 8          |          |                    |
| <i>klf-3</i> o/e 10ng            | <b>*Line #1</b> 16.578 $\pm$ 0.372                      | 79/90             | 20         | 16         | 14         | -6       | 0.162              |
|                                  | <b>#Line #2</b> 16.345 $\pm$ 0.396                      | 64/90             | 20         | 16         | 14         | -4       | 0.268              |
|                                  | <b>+Line #3</b> 16.532 $\pm$ 0.414                      | 69/90             | 20         | 16         | 14         | -3       | 0.744              |
| <i>klf-3</i> o/e 50ng            | <b>#Line #1</b> 22.673 $\pm$ 0.857                      | 51/90             | 26         | 23         | 18         | +8       | <b>0.007</b>       |
|                                  | <b><math>\Delta</math>Line #1</b> 16.333 $\pm$ 0.473    | 51/60             | 19         | 17         | 15         | +9       | <b>0.050</b>       |
|                                  | <b><math>^{\circ}</math> Line #2</b> 21.760 $\pm$ 0.661 | 99/180            | 26         | 22         | 16         | +11      | <b>&lt;0.001</b>   |
|                                  | <b>#Line #2</b> 26.390 $\pm$ 1.774                      | 17/60             | 31         | 27         | 21         | +34      | <b>&lt;0.001</b>   |
| Mutant <i>klf-3</i> o/e 50ng     | <b><math>\phi</math> Line #1</b> 20.456 $\pm$ 0.320     | 171/183           | 24         | 22         | 18         | -3       | 0.056              |
|                                  | <b><math>\epsilon</math>Line #2</b> 13.956 $\pm$ 0.384  | 45/60             | 17         | 13         | 12         | -4       | 0.250              |
|                                  | <b><math>\zeta</math>Line #2</b> 13.233 $\pm$ 0.556     | 30/60             | 15         | 13         | 11         | -8       | 0.130              |
|                                  | <b><math>\theta</math>Line #2</b> 13.479 $\pm$ 0.367    | 48/60             | 15         | 12         | 12         | +2       | 0.633              |

**Supplementary Table 4: Lifespan analysis of *C. elegans* with *klf-3* over-expression (o/e).** Results of lifespan analysis of wild-type (WT, N2) and *klf-3* overexpressing animals. Animals were raised and incubated at 20°C and fed OP50 E. coli. Data show the average lifespan, number of events, day at which 25, 50 or 75% of animals remained alive, % change, and p value vs control calculated by Mantel-Cox log-rank test. Symbols represent experimental and control groups used to calculate p-values.

| Gene                   | Mammalian Ortholog      | Position from start codon |
|------------------------|-------------------------|---------------------------|
| <i>unc-51</i>          | <i>ulk1</i>             | -11                       |
| <i>epg-1</i>           | <i>atg13</i>            | -400<br>-450              |
| <i>epg-3</i>           | <i>vmp1</i>             | -547<br>-882              |
| <i>epg-9</i> isoform b | <i>atg101</i>           | -586<br>-590              |
| <i>vps34</i> isoform c | <i>pik3c3</i>           | 4                         |
| <i>vps15</i> isoform a | <i>pik3r4</i>           | 151<br>-956               |
| <i>vps15</i> isoform b | <i>pik3r4</i>           | -356<br>-385              |
| <i>atg16.1</i>         | <i>atg16L1, atg16L2</i> | 48                        |
| <i>atg-7</i>           | <i>atg7</i>             | -1055                     |
| <i>atg-2</i>           | <i>atg2</i>             | 56<br>-610<br>-655        |
| <i>atg-9</i> isoform a | <i>atg9</i>             | -108<br>-173              |
| <i>atg-9</i> isoform b |                         | -1017                     |
| <i>epg-5</i>           | <i>epg5</i>             | 61                        |

**Supplementary Table 5: In silico search identifies presence of KLF response elements GA/GCCC within 1000 base pairs upstream and 200 base pairs downstream of start codon in autophagy genes.** Promoters of autophagy related genes were manually searched for presence of GACCC or GGCCC boxes using UCSD Genome browser, and positions indicated relative to start codon.

| Strains | RNAi | Avg lifespan $\pm$ s.e.m. | Number of | 25% | 50% | 75% | % | P-value |
|---------|------|---------------------------|-----------|-----|-----|-----|---|---------|
|---------|------|---------------------------|-----------|-----|-----|-----|---|---------|



|                  | treatments      | (Days)                       | animals           | (Days)     | (Days)     | (Days)     | change   | vs control         |
|------------------|-----------------|------------------------------|-------------------|------------|------------|------------|----------|--------------------|
| N2               | Vector control  | *18.329±0.749                | 64/90             | 23         | 18         | 14         |          |                    |
| N2               | <i>bec-1</i>    | *17.038 ± 0.426              | 79/90             | 19         | 15         | 15         | -7       | <0.0001            |
| <i>klf-3</i> o/e | Vector control  | *21.985±1.001                | 48/90             | 25         | 23         | 16         | +20      | <b>0.029</b>       |
| <i>klf-3</i> o/e | <i>bec-1</i>    | *17.769 ± 0.541              | 70/90             | 21         | 18         | 14         | -19      | <0.0001            |
| <i>klf-3</i> o/e | <i>bec-1</i>    | *18.198 ± 0.420              | 82/90             | 22         | 19         | 15         | -17      | <0.0001            |
| <i>klf-3</i> o/e | <i>bec-1</i>    | *13.711 ± 0.334              | 76/90             | 16         | 14         | 12         | -38      | <0.0001            |
| N2               | Vector control  | #18.685±0.597                | 73/90             | 22         | 18         | 14         |          |                    |
| N2               | <i>bec-1</i>    | #15.221±0.359                | 76/90             | 18         | 16         | 12         | -18      | <0.0001            |
| <i>klf-3</i> o/e | Vector control  | #21.462 ± 0.688              | 78/90             | 24         | 22         | 18         | +15      | <b>0.0024</b>      |
| N2               | Vector control  | †20.457±0.649                | 81/90             | 24         | 19         | 15         |          |                    |
| N2               | <i>lgg-3</i>    | +20.469 ± 0.576              | 77/90             | 24         | 22         | 17         | <0.1     | 0.989              |
| N2               | <i>atg-7</i>    | +20.067 ± 0.681              | 56/91             | 22         | 22         | 17         | -2       | 0.816              |
| N2               | <i>atg-13</i>   | +19.138±0.407                | 109/120           | 23         | 21         | 17         | -6       | <b>0.00851</b>     |
| <i>klf-3</i> o/e | Vector control  | +22.802 ± 0.768              | 66/90             | 29         | 22         | 17         | +11      | <b>0.0273</b>      |
| <i>klf-3</i> o/e | <i>lgg-3</i>    | +21.426 ± 0.702              | 72/90             | 24         | 22         | 17         | -6       | 0.0567             |
| <i>klf-3</i> o/e | <i>atg-7</i>    | +21.035 ± 1.013              | 58/91             | 29         | 22         | 15         | -8       | 0.845              |
| <i>klf-3</i> o/e | <i>atg-7</i>    | +19.030 ± 0.876              | 33/90             | 21         | 18         | 14         | -16      | <b>0.0161</b>      |
| <i>klf-3</i> o/e | <i>atg-13</i>   | +19.519±0.464                | 79/120            | 23         | 21         | 15         | -14      | <0.0001            |
| N2               | Vector control  | Δ15.441±0.595                | 59/60             | 20         | 14         | 12         |          |                    |
| N2               | <i>lgg-3</i>    | Δ15.628±0.650                | 43/60             | 20         | 16         | 12         | +1       | 0.956              |
| N2               | <i>atg-7</i>    | Δ16.370±0.609                | 54/60             | 20         | 16         | 14         | +6       | 0.306              |
| <i>klf-3</i> o/e | Vector control  | Δ17.830±0.611                | 53/60             | 20         | 20         | 14         | +15      | <b>0.011</b>       |
| <i>klf-3</i> o/e | <i>lgg-3</i>    | Δ14.578±0.605                | 45/60             | 18         | 14         | 12         | -18      | <0.001             |
| <i>klf-3</i> o/e | <i>atg-7</i>    | Δ15.765±0.645                | 51/60             | 20         | 14         | 12         | -12      | <b>0.030</b>       |
| Strains          | RNAi treatments | Avg lifespan ± s.e.m. (Days) | Number of animals | 25% (Days) | 50% (Days) | 75% (Days) | % change | P-value vs control |
| N2               | Vector control  | *15.289±0.337                | 45/60             | 17         | 17         | 13         |          |                    |
| N2               | <i>bec-1</i>    | <b>*Line #1</b> 15.696±0.326 | 46/60             | 17         | 15         | 15         | +3       | 0.579              |
| N2               | <i>bec-1</i>    | <b>*Line #1</b> 15.896±0.335 | 48/60             | 18         | 16         | 14         | +4       | 0.081              |
| N2               | <i>atg-13</i>   | <b>*Line #1</b> 15.021±0.364 | 48/60             | 17         | 15         | 13         | -2       | 0.778              |
| N2               | <i>atg-13</i>   | <b>*Line #1</b> 16.735±0.419 | 49/60             | 18         | 16         | 14         | +9       | <b>0.002</b>       |
| <i>klf-1</i> o/e | Vector control  | <b>*Line #1</b> 16.703±0.340 | 37/60             | 17         | 17         | 15         | +9       | <b>0.004</b>       |
| <i>klf-1</i> o/e | <i>bec-1</i>    | <b>*Line #1</b> 15.049±0.407 | 41/60             | 17         | 15         | 13         | -10      | <b>0.005</b>       |
| <i>klf-1</i> o/e | <i>atg-13</i>   | <b>*Line #1</b> 14.820±0.360 | 50/60             | 17         | 15         | 13         | -11      | <b>0.001</b>       |
| N2               | Vector control  | #15.795±0.432                | 39/60             | 18         | 16         | 14         |          |                    |
| N2               | <i>bec-1</i>    | <b>#Line #2</b> 15.615±0.415 | 26/60             | 18         | 16         | 14         | -1       | 0.670              |
| N2               | <i>atg-13</i>   | <b>#Line #2</b> 17.250±0.565 | 36/60             | 18         | 18         | 16         | +9       | <b>0.009</b>       |
| <i>klf-1</i> o/e | Vector control  | <b>#Line #1</b> 16.180±0.429 | 50/60             | 18         | 16         | 14         | +6       | <b>0.004</b>       |
| <i>klf-1</i> o/e | <i>bec-1</i>    | <b>#Line #1</b> 14.920±0.329 | 50/60             | 16         | 14         | 14         | -8       | <b>0.007</b>       |
| <i>klf-1</i> o/e | <i>atg-13</i>   | <b>#Line #1</b> 16.265±0.353 | 49/60             | 18         | 16         | 14         | -1       | 0.931              |

|                  |                |                       |       |    |    |    |     |         |
|------------------|----------------|-----------------------|-------|----|----|----|-----|---------|
| N2               | Vector control | †16.020±0.367         | 51/60 | 18 | 16 | 14 |     |         |
| N2               | <i>bec-1</i>   | †Line #2 15.821±0.311 | 56/60 | 18 | 16 | 14 | -1  | 0.490   |
| N2               | <i>atg-13</i>  | †Line #2 16.634±0.501 | 41/60 | 18 | 18 | 14 | +4  | 0.119   |
| <i>klf-1 o/e</i> | Vector control | †Line #2 18.105±0.475 | 38/60 | 21 | 18 | 16 | +14 | <0.0001 |
| <i>klf-1 o/e</i> | <i>bec-1</i>   | †Line #2 14.941±0.494 | 34/60 | 18 | 16 | 12 | -17 | <0.001  |
| <i>klf-1 o/e</i> | <i>atg-13</i>  | †Line #2 16.389±0.307 | 36/60 | 18 | 16 | 16 | -9  | 0.001   |
| <i>klf-1 o/e</i> | Vector control | ‡Line #2 18.113±0.332 | 71/90 | 21 | 18 | 16 | +13 | <0.0001 |
| <i>klf-1 o/e</i> | <i>bec-1</i>   | ‡Line #2 15.468±0.285 | 79/90 | 18 | 16 | 14 | -15 | <0.0001 |
| <i>klf-1 o/e</i> | <i>atg-13</i>  | ‡Line #2 16.717±0.384 | 53/60 | 18 | 18 | 14 | -8  | 0.024   |

**Supplementary Table 6: Lifespan analysis of *C. elegans klf-3* and *klf-1 o/e* animals with reduced *beclin-1*, *lgg-3*, *atg-13* or *atg-7* levels.** Results of lifespan analysis of wild-type (WT, N2), *klf-1 o/e* and *klf-3 o/e* animals with reduced *beclin-1*, *lgg-3*, *atg-13* or *atg-7* levels. Animals were raised and incubated at 20°C and fed control bacteria or bacteria expressing dsRNA against *bec-1*, *lgg-3*, *atg-13* or *atg-7* beginning at adulthood. Data show the average lifespan, number of events, day at which 25, 50 or 75% of animals remained alive, % change, and p value vs control calculated by Mantel-Cox log-rank test. \*,#,†,‡ symbols represent experimental and control groups used to calculate p-values.

| Gene Symbol | Gene                                                         | Ad-KLF4     |          | Si-KLF4     |          |
|-------------|--------------------------------------------------------------|-------------|----------|-------------|----------|
|             |                                                              | Fold change | p-value  | Fold change | p-value  |
| Akt1        | Akt1 Thymoma viral proto-oncogene 1                          | 1.327340199 | 0.254401 | 0.009209    | 0.447711 |
| Ambra1      | Ambra1 Autophagy/beclin 1 regulator 1                        | 1.228958126 | 0.416754 | 0.001683    | 0.177829 |
| App         | App Amyloid beta (A4) precursor protein                      | 1.60474612  | 0.034567 | 0.154681    | 0.494304 |
| Atg10       | Atg10 Autophagy-related 10 (yeast)                           | 1.425749629 | 0.023084 | 0.014835    | 0.256999 |
| Atg12       | Atg12 Autophagy-related 12 (yeast)                           | 1.196807825 | 0.674936 | 0.320318    | 0.123725 |
| Atg16l1     | Atg16l1 Autophagy-related 16-like 1 (yeast)                  | 1.483233049 | 0.204173 | 0.056958    | 0.016263 |
| Atg16l2     | Atg16l2 Autophagy related 16 like 2 ( <i>S. cerevisiae</i> ) | 1.245718812 | 0.105069 | 0.002388    | 0.256191 |

|         |                                                                                    |             |          |          |          |
|---------|------------------------------------------------------------------------------------|-------------|----------|----------|----------|
| Atg3    | Atg3 Autophagy-related 3 (yeast)                                                   | 1.281709031 | 0.043529 | 1.018364 | 0.074163 |
| Atg4a   | Atg4a Autophagy-related 4A (yeast)                                                 | 1.179714413 | 0.365416 | 0.038879 | 0.125473 |
| Atg4b   | Atg4b Autophagy-related 4B (yeast)                                                 | 1.051028754 | 0.835466 | 0.031047 | 0.047305 |
| Atg4c   | Atg4c Autophagy-related 4C (yeast)                                                 | 1.340569337 | 0.108125 | 0.003613 | 0.241178 |
| Atg4d   | Atg4d Autophagy-related 4D (yeast)                                                 | 1.178258062 | 0.295444 | 0.002987 | 0.284877 |
| Atg5    | Atg5 Autophagy-related 5 (yeast)                                                   | 1.464541801 | 0.021238 | 0.01512  | 0.01482  |
| Atg7    | Atg7 Autophagy-related 7 (yeast)                                                   | 1.757102179 | 0.033926 | 0.004523 | 0.01853  |
| Atg9a   | Atg9a Autophagy-related 9A (yeast)                                                 | 1.583941338 | 0.078667 | 0.01268  | 0.09882  |
| Atg9b   | Atg9b ATG9 autophagy related 9 homolog B ( <i>S. cerevisiae</i> )                  | 6.014516821 | 0.001354 | 0.013333 | 0.040475 |
| Bad     | Bad BCL2-associated agonist of cell death                                          | 1.574183063 | 0.07013  | 0.006672 | 0.300996 |
| Bak1    | Bak1 BCL2-antagonist/killer 1                                                      | 1.266228163 | 0.074049 | 0.063784 | 0.494212 |
| Bax     | Bax Bcl2-associated X protein                                                      | 2.057840745 | 0.00171  | 0.169633 | 0.21892  |
| Bcl2    | Bcl2 B-cell leukemia/lymphoma 2                                                    | 1.112144673 | 0.431891 | 0.002189 | 0.382453 |
| Bcl2l1  | Bcl2l1 Bcl2-like 1                                                                 | 1.915531535 | 0.025244 | 0.036572 | 0.103121 |
| Becn1   | Becn1 Beclin 1, autophagy related                                                  | 1.34217958  | 0.088816 | 0.188975 | 0.186299 |
| Bid     | Bid BH3 interacting domain death agonist                                           | 1.286287008 | 0.222125 | 0.02754  | 0.414679 |
| Bnip3   | Bnip3 BCL2/adenovirus E1B interacting protein 3                                    | 1.085133749 | 0.682742 | 0.106987 | 0.113609 |
| Casp3   | Casp3 Caspase 3                                                                    | 1.157902293 | 0.402601 | 0.019106 | 0.157401 |
| Casp8   | Casp8 Caspase 8                                                                    | 1.307296033 | 0.020224 | 0.105532 | 0.061667 |
| Cdkn1b  | Cdkn1b Cyclin-dependent kinase inhibitor 1B                                        | 1.295627957 | 0.00797  | 0.051723 | 0.221934 |
| Cdkn2a  | Cdkn2a Cyclin-dependent kinase inhibitor 2A                                        | 1.375764041 | 0.043348 | 0.231044 | 0.329122 |
| Cln3    | Cln3 Ceroid lipofuscinosis, neuronal 3, juvenile (Batten, Spielmeyer-Vogt disease) | 1.489875867 | 0.012428 | 0.033266 | 0.167903 |
| Ctsb    | Ctsb Cathepsin B                                                                   | 1.273471195 | 0.081674 | 0.259226 | 0.212809 |
| Ctsd    | Ctsd Cathepsin D                                                                   | 2.580733772 | 0.001128 | 0.174647 | 0.071874 |
| Ctss    | Ctss Cathepsin S                                                                   | 0.941888961 | 0.85147  | 0.003004 | 0.006181 |
| Cxcr4   | Cxcr4 Chemokine (C-X-C motif) receptor 4                                           | 1.59861585  | 0.357793 | 0.007247 | 0.009969 |
| Dapk1   | Dapk1 Death associated protein kinase 1                                            | 39.98316719 | 0.003175 | 0.002045 | 0.100198 |
| Dram1   | Dram1 DNA-damage regulated autophagy modulator 1                                   | 1.23292354  | 0.311832 | 0.014585 | 0.221131 |
| Dram2   | Dram2 VDNA-damage regulated autophagy modulator 2                                  | 1.042385441 | 0.863548 | 0.122662 | 0.083061 |
| Eif2ak3 | Eif2ak3 Eukaryotic translation initiation factor 2 alpha kinase 3                  | 1.506653863 | 0.002257 | 0.004903 | 0.479695 |
| Eif4g1  | Eif4g1 Eukaryotic translation initiation factor 4, gamma 1                         | 1.309559236 | 0.069926 | 0.086649 | 0.258593 |

|           |                                                                                  |             |          |          |          |
|-----------|----------------------------------------------------------------------------------|-------------|----------|----------|----------|
| Esrl      | Esrl Estrogen receptor 1 (alpha)                                                 | 2.558243166 | 0.01055  | 0.00153  | 0.000873 |
| Fadd      | Fadd Fas (TNFRSF6)-associated via death domain                                   | 1.766063929 | 0.0024   | 0.018152 | 0.132465 |
| Fas       | Fas Fas (TNF receptor superfamily member 6)                                      | 1.756495976 | 0.000857 | 0.030314 | 0.455572 |
| Gaa       | Gaa Glucosidase, alpha, acid                                                     | 1.352835291 | 0.03951  | 0.023321 | 0.395567 |
| Gabarap   | Gabarap Gamma-aminobutyric acid receptor associated protein                      | 1.577727143 | 0.003181 | 4.32585  | 0.076842 |
| Gabarapl1 | Gabarapl1 Gamma-aminobutyric acid (GABA) A receptor-associated protein-like 1    | 0.99642974  | 0.978842 | 0.070326 | 0.020267 |
| Gabarapl2 | Gabarapl2 Gamma-aminobutyric acid (GABA) A receptor-associated protein-like 2    | 1.615659046 | 0.000495 | 0.626835 | 0.014046 |
| Hdac1     | Hdac1 Histone deacetylase 1                                                      | 1.257022171 | 0.060447 | 0.128535 | 0.411764 |
| Hdac6     | Hdac6 Histone deacetylase 6                                                      | 1.069122585 | 0.684363 | 0.021849 | 0.359177 |
| Hgs       | Hgs HGF-regulated tyrosine kinase substrate                                      | 1.099562183 | 0.606127 | 0.002232 | 0.153286 |
| Hsp90aa1  | Hsp90aa1 Heat shock protein 90, alpha (cytosolic), class A member 1              | 1.290278748 | 0.069164 | 3.212159 | 0.047711 |
| Hspa8     | Hspa8 Heat shock protein 8                                                       | 1.326943664 | 0.017792 | 4.235619 | 0.282432 |
| Htt       | Htt Huntingtin                                                                   | 1.517617176 | 0.085919 | 0.016382 | 0.058418 |
| Igf1      | Igf1 Insulin-like growth factor 1                                                | 0.726060141 | 0.023102 | 0.015319 | 0.240725 |
| Ins2      | Ins2 Insulin II                                                                  | 1.340773171 | 0.372231 | 0.005285 | 0.011126 |
| Irgm1     | Irgm1 Immunity-related GTPase family M member 1                                  | 1.672913645 | 0.000162 | 0.134292 | 0.234999 |
| Lamp1     | Lamp1 Lysosomal-associated membrane protein 1                                    | 1.387001135 | 0.002644 | 1.450752 | 0.107813 |
| Map1lc3a  | Map1lc3a Microtubule-associated protein 1 light chain 3 alpha                    | 1.42159875  | 0.023682 | 0.011569 | 0.439651 |
| Map1lc3b  | Map1lc3b Microtubule-associated protein 1 light chain 3 beta                     | 1.365329598 | 0.030471 | 0.682735 | 0.082414 |
| Mapk14    | Mapk14 Mitogen-activated protein kinase 14                                       | 1.287663501 | 0.096587 | 0.025889 | 0.111233 |
| Mapk8     | Mapk8 Mitogen-activated protein kinase 8                                         | 1.066681037 | 0.645991 | 0.084303 | 0.035607 |
| Mtor      | Mtor Mechanistic target of rapamycin (serine/threonine kinase)                   | 1.172830442 | 0.181199 | 0.007716 | 0.229621 |
| Nfkb1     | Nfkb1 Nuclear factor of kappa light polypeptide gene enhancer in B-cells 1, p105 | 0.86134866  | 0.215631 | 0.030293 | 0.189956 |
| Npc1      | Npc1 Niemann Pick type C1                                                        | 1.519586063 | 0.109928 | 0.056143 | 0.018579 |
| Pik3c3    | Pik3c3 Phosphoinositide-3-kinase, class 3                                        | 1.634336738 | 0.010575 | 0.030809 | 0.24255  |
| Pik3cg    | Pik3cg Phosphoinositide-3-kinase, catalytic, gamma polypeptide                   | 1.25648993  | 0.362266 | 0.028767 | 0.066656 |
| Pik3r4    | Pik3r4 Phosphatidylinositol 3 kinase,                                            | 1.312284879 | 0.047011 | 0.019348 | 0.006781 |

|         |                                                                 |             |          |          |          |
|---------|-----------------------------------------------------------------|-------------|----------|----------|----------|
|         | regulatory subunit, polypeptide 4, p150                         |             |          |          |          |
| Prkaa1  | Prkaa1 Protein kinase, AMP-activated, alpha 1 catalytic subunit | 1.273955047 | 0.024822 | 0.121013 | 0.090569 |
| Pten    | Pten Phosphatase and tensin homolog                             | 1.605137955 | 0.00352  | 0.26807  | 0.060306 |
| Rab24   | Rab24 RAB24, member RAS oncogene family                         | 1.400002233 | 0.010021 | 0.075073 | 0.198763 |
| Rb1     | Rb1 Retinoblastoma 1                                            | 1.723245533 | 0.045258 | 0.022524 | 0.314655 |
| Rgs19   | Rgs19 Regulator of G-protein signaling 19                       | 0.985581106 | 0.883557 | 0.054465 | 0.094282 |
| Rps6kb1 | Rps6kb1 Ribosomal protein S6 kinase, polypeptide 1              | 1.300832513 | 0.203962 | 0.230742 | 0.003843 |
| Snca    | Snca Synuclein, alpha                                           | 0.979739715 | 0.794658 | 0.006582 | 0.05751  |
| Sqstm1  | Sqstm1 Sequestosome 1                                           | 0.836892275 | 0.336786 | 0.726911 | 0.002866 |
| Tgfb1   | Tgfb1 Transforming growth factor, beta 1                        | 1.402128686 | 0.009127 | 0.030374 | 0.128108 |
| Tgm2    | Tgm2 Transglutaminase 2, C polypeptide                          | 1.683038425 | 0.011647 | 0.012388 | 0.034136 |
| Tmem74  | Tmem74 Transmembrane protein 74                                 | 0.784957053 | 0.247943 | 0.017321 | 0.05757  |
| Tnf     | Tnf Tumor necrosis factor                                       | 1.204004432 | 0.797815 | 0.000472 | 0.135775 |
| Tnfsf10 | Tnfsf10 Tumor necrosis factor (ligand) superfamily, member 10   | 1.960977355 | 0.023288 | 0.008546 | 0.011834 |
| Trp53   | rp53 Transformation related protein 53                          | 1.175304136 | 0.037463 | 0.326284 | 0.052572 |
| Ulk1    | Ulk1 Unc-51 like kinase 1 (C. elegans)                          | 1.387537296 | 0.016975 | 0.01695  | 0.07797  |
| Ulk2    | Ulk2 Unc-51 like kinase 2 (C. elegans)                          | 1.123750385 | 0.339582 | 0.012785 | 0.478719 |
| Uvrag   | Uvrag UV radiation resistance associated gene                   | 1.139726986 | 0.444456 | 0.013047 | 0.394375 |
| Wipi1   | Wipi1 WD repeat domain, phosphoinositide interacting 1          | 1.203542904 | 0.288162 | 0.009851 | 0.495238 |

**Supplementary Table 7. KLF4 manipulation alters expression of a broad spectrum of genes in the autophagy pathway.** MEFs were infected with adenovirus expressing KLF4 mRNA or KLF4-targeting shRNA for 72 h. Corresponding empty viruses (Ad-EV, Sh-EV) were used as control. Table shows fold changes and p-values for each gene assessed. ( $p < 0.05$  by Student T-test,  $N=3$ ).

| <b>Gene</b>  | <b>Forward primer 5'-3'</b> | <b>Reverse primer 5'-3'</b> |
|--------------|-----------------------------|-----------------------------|
| Epg-2        | tcgtcagcagaggatcaaga        | gccagcattttgtccaagt         |
| Atg-2        | ctcaaccacatggtgtcgtc        | catcggatggaaagtaacacca      |
| Epg-4        | ttcaggagcctgtatgagagc       | agcgcagaaatgagagtcc         |
| Unc-51       | aaaagggcatcgtacatcgt        | atfttgggtgcgggagt           |
| Vps34        | aacctgtcagaaggttgaatc       | tgacgagcaagttgagagga        |
| Atg16.1      | cagaagttgctttagaagaaaacg    | ttttgtccttgcgggtga          |
| Epg-1/atg-13 | atccagcaaaggaaccaag         | tggagttgatttggagaattg       |
| Pha-4        | ctacaccaacggagtataaccagaa   | ggagaacgtgtgaattggaga       |
| Atg-7        | tcttgctatttctgcagtgatgt     | gttctggtcgtgcaacag          |
| Atg-9        | ggtcttcacgatgagagtattatcc   | tgcatgttgaagcttgacg         |
| Vps15        | cgatcgattgagcacgag          | tgaagagcaggaagatgtacca      |
| Epg-3        | cgagtgtcagagcctggatt        | cttttgttgaggggcattg         |
| Epg-5        | gcgccaggattagtagtcaag       | ccaattgaggccaatgagt         |
| Epg-9        | gaagtcagttgtgagcagattga     | tggtcttccacttcacatt         |
| Klf-1        | cgagctaacaaggcactatagga     | Tggcgtttcatatggagtga        |
| Klf-2        | tcattttacacgggacctgtt       | gtttgttgacatggttatgatg      |
| Klf-3        | catcgccaaacatftttcag        | Gcgtcgttcaatcgcttc          |
| P16          | gggttttcttgggtgaagtgcg      | ttgcccacatcatcacct          |
| P21          | tccacagcgatatccagaca        | ggacatcaccaggattggac        |

**Supplementary Table 8. List of qRT-PCR primers**

| <b>Gene</b> | <b>Forward primer 5'-3'</b> | <b>Reverse primer 5'-3'</b> |
|-------------|-----------------------------|-----------------------------|
| GATA6       | tgttgaactgtgcagcttttct      | taatgatgcacacacaacctga      |
| BECN1       | gcttccaatttgggtggata        | aatactgggcaaggcatcat        |
| LC3B        | gggaagagccacaagatcag        | tcattccccttcagtccttg        |
| ULK1        | aactgtgggcagagcctaga        | gccatcatgcctagtcacct        |
| ATG7        | gctcatgacttctgttgct         | caatgggctgtgactgcaag        |
| ATG9        | ttttctgggtgtgtgcttg         | acaaaacacaacatccccact       |
| CTSD        | cgtagaagcagcgcatagtc        | ctctagcccttctgtgca          |
| GABARAPL1   | ccttctctggacgtttagcc        | gatggacctcaggatgtaggg       |
| PIK3C3      | cttcttgcttctgtaccgc         | gggcgactcagtctatcgg         |

**Supplementary Table 9. List of CHIP-qPCR primers**
